# Supplementary material for: Origin of the plant Tm-1-like gene via two independent horizontal transfer events and one gene fusion event
Source: PubMed Central journal article supplement (PMC5028733; doi:10.1038/srep33691), 2016-09-20
Supplement: srep33691-s1.pdf [file srep33691-s1.pdf]

## Supplementary Information

### Origin of the plant *Tm-1-like* gene via two independent horizontal transfer events and one gene fusion event

Zefeng Yang<sup>1</sup>, Li Liu<sup>1</sup>, Huimin Fang<sup>1</sup>, Pengcheng Li<sup>1</sup>, Shuhui Xu<sup>1</sup>, Wei Cao<sup>1</sup>, Chenwu Xu<sup>1,#</sup>,  
Jinling Huang<sup>2,#</sup>, Yong Zhou<sup>1,#</sup>

1 Jiangsu Key Laboratory of Crop Genetics and Physiology/Co-Innovation Center for Modern Production Technology of Grain Crops, Key Laboratory of Plant Functional Genomics of the Ministry of Education, Yangzhou University, Yangzhou, 225009, China

2 Department of Biology, East Carolina University, Greenville, NC, 27858, USA

# Corresponding author: Chenwu Xu

Email: [qtls@yzu.edu.cn](mailto:qtls@yzu.edu.cn)

Jinling Huang

Email: [huangj@ecu.edu](mailto:huangj@ecu.edu)

Yong Zhou

Email: [zhouyong@yzu.edu.cn](mailto:zhouyong@yzu.edu.cn)

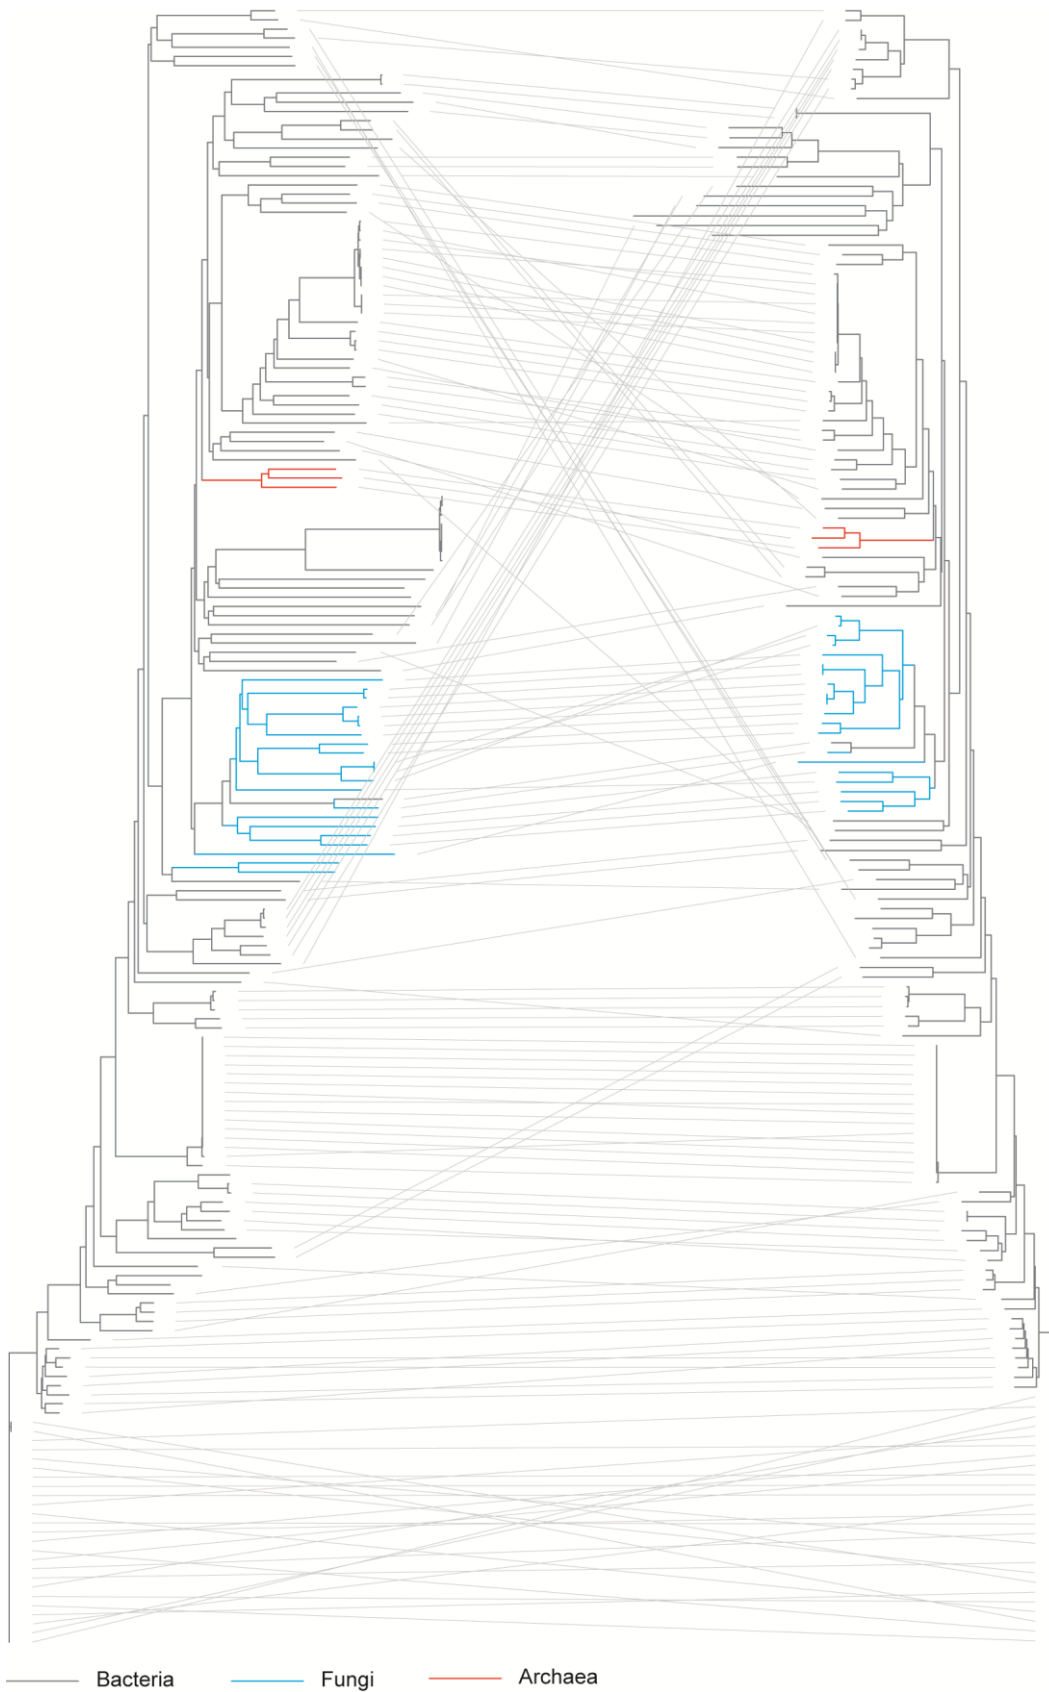

**Supplementary Figure S1** UPF0261 and TBST phylogenies of bacteria, archaea and fungi.

**Supplementary Table S1** List of *Tm-1L* genes in 18 representative streptophyte plant genomes

| Lineage          | Species                           | Gene            | Locus                            | Length | Intron | Chr/scaffold           | Location           |
|------------------|-----------------------------------|-----------------|----------------------------------|--------|--------|------------------------|--------------------|
| Charophyta       | <i>Klebsormidium flaccidum</i>    | <i>KfTm-1L</i>  | KFL_000010590                    | 745    | 11     | DF236950               | 379034..385338     |
| Bryophyta        | <i>Physcomitrella patens</i>      | <i>PpTm-1L</i>  | Phpat.020G033800                 | 742    | 9      | Chr20                  | 4976232..4982023   |
| Lycophyte        | <i>Selaginella moellendorffii</i> | <i>SmTm-1L</i>  | 402546                           | 741    | 8      | scaffold_0             | 3515380..3518137   |
| Gymnosperm       | <i>Picea abies</i>                | <i>PaTm-1L</i>  | MA_38249g0010,<br>MA_532686g0010 | 756    | 8      | MA_38249,<br>MA_532686 | /                  |
| Basal angiosperm | <i>Amborella trichopoda</i>       | <i>AmTm-1L</i>  | LOC18422510                      | 753    | 8      | NW_006494910           | c2909069-2865124   |
|                  | <i>Arabidopsis thaliana</i>       | <i>AtTm-1L</i>  | AT5G66420                        | 754    | 8      | Chr5                   | 26521674..26525081 |
|                  | <i>Vitis vinifera</i>             | <i>VvTm-1L</i>  | GSVIVG01018892001                | 756    | 8      | chr4                   | 18877449..18887691 |
|                  | <i>Medicago truncatula</i>        | <i>MtTm-1L</i>  | Medtr8g076950                    | 753    | 7      | chr8                   | 32654902..32660930 |
|                  | <i>Eucalyptus grandis</i>         | <i>EgTm-1L</i>  | Eucgr.I02404                     | 752    | 8      | scaffold_9             | 34690554..34697372 |
| Dicots           | <i>Citrus sinensis</i>            | <i>CsTm-1L</i>  | orange1.1g004491m                | 749    | 8      | scaffold00017          | 132259..136518     |
|                  | <i>Aquilegia coerulea</i>         | <i>AcTm-1La</i> | Aquca_007_00265                  | 755    | 8      | scaffold_7             | 2333433..2344601   |
|                  | <i>Aquilegia coerulea</i>         | <i>AcTm-1Lb</i> | Aquca_007_00452                  | 755    | 8      | scaffold_7             | 3740338..3751318   |
|                  | <i>Mimulus guttatus</i>           | <i>MgTm-1L</i>  | Migut.H02523                     | 757    | 7      | scaffold_8             | 24733948..24737497 |
|                  | <i>Solanum lycopersicum</i>       | <i>SlTm-1</i>   | Solyc02g062560.2                 | 754    | 8      | SL2.40ch02             | 28856001..28864037 |

|          |                                |                 |                  |     |   |              |                    |
|----------|--------------------------------|-----------------|------------------|-----|---|--------------|--------------------|
| Monocots | <i>Oryza sativa</i>            | <i>OsTm-1L</i>  | LOC_Os06g27800   | 743 | 8 | Chr6         | 15738385..15744846 |
|          | <i>Sorghum bicolor</i>         | <i>SbTm-1L</i>  | Sobic.010G120300 | 738 | 8 | Chr10        | 13695478..13701591 |
|          | <i>Setaria italica</i>         | <i>SiTm-1L</i>  | Si005932m        | 737 | 8 | scaffold_4   | 19160170..19165161 |
|          | <i>Brachypodium distachyon</i> | <i>BdTm-1La</i> | Bradi2g26330     | 747 | 8 | Bd2          | 24754515..24761742 |
|          | <i>Brachypodium distachyon</i> | <i>BdTm-1Lb</i> | Bradi1g38790     | 747 | 8 | Bd1          | 35398499..35405959 |
|          | <i>Phoenix dactylifera</i>     | <i>PdTm-1L</i>  | LOC103703748     | 753 | 8 | NW_008246535 | 256851-268834      |

---

**Supplementary Table S2** List of 416 pairs of genes encoding UPF0261- and TBST-domain-containing proteins in bacteria, archaea and fungi

| Lineage | Species                              | UPF0261 Gene   |                                                | TBST Gene      |                                                |
|---------|--------------------------------------|----------------|------------------------------------------------|----------------|------------------------------------------------|
|         |                                      | Locus          | Location                                       | Locus          | Location                                       |
| Archaea | <i>Haladaptatus paucihalophilus</i>  | WP_007980763.1 | NZ_AEMG01000014.1:<br>complement(9617..10837)  | WP_007980765.1 | NZ_AEMG01000014.1:<br>complement(10839..11672) |
| Archaea | <i>Halalkalicoccus jeotgali</i>      | WP_008414151.1 | NC_014298.1: (328077..329303,<br>complement)   | WP_008414152.1 | NC_014298.1: (329305..330138,<br>complement)   |
| Archaea | <i>Halapricum salinum</i>            | WP_049993000.1 | NZ_BBMO01000001:<br>complement(660447..661673) | WP_049993002.1 | NZ_BBMO01000001:<br>complement(662100..662933) |
| Archaea | <i>Haloarcula amylytica</i>          | WP_008308240.1 | NZ_AOLW01000010:<br>230865..232091             | WP_008308236.1 | NZ_AOLW01000010:<br>229602..230435             |
| Archaea | <i>Haloarcula californiae</i>        | WP_007190505.1 | NZ_AOLS01000106: 2586..3806                    | WP_007190504.1 | NZ_AOLS01000106: 1325..2161                    |
| Archaea | <i>Haloarcula hispanica</i>          | WP_014030967.1 | NC_023010:<br>complement(328935..330161)       | WP_014030969.1 | NC_023010:<br>complement(330582..331424)       |
| Archaea | <i>Haloarcula japonica</i>           | WP_004590970.1 | NZ_AOLY01000007:<br>complement(47090..48298)   | WP_004590972.1 | NZ_AOLY01000007:<br>complement(48327..49163)   |
| Archaea | <i>Haloarcula marismortui</i>        | WP_011224960.1 | NC_006397: 152450..153670                      | WP_049939228.1 | NC_006397: 151189..152025                      |
| Archaea | <i>Haloarcula</i> sp. CBA1127        | WP_058991501.1 | NZ_BCNB01000001:<br>complement(262875..264101) | WP_058991321.1 | NZ_BCNB01000001:<br>complement(264531..265364) |
| Archaea | <i>Halobacteriaceae archaeon</i> SB9 | WP_058581343.1 | NZ_LOPU01000018:<br>386581..387807             | WP_058581341.1 | NZ_LOPU01000018:<br>385275..386114             |
| Archaea | <i>Halococcus agarilyticus</i>       | WP_049903376.1 | NZ_BAFM01000021:<br>19050..20273               | WP_049903423.1 | NZ_BAFM01000021:<br>20359..21186               |
| Archaea | <i>Haloferax</i> sp. SB29            | WP_058572005.1 | NZ_LOPV01000158:                               | WP_058572010.1 | NZ_LOPV01000158:                               |

|          |                                      |                |                                                 |                |                                                |
|----------|--------------------------------------|----------------|-------------------------------------------------|----------------|------------------------------------------------|
|          |                                      |                | complement(18856..20091)                        |                | complement(20125..20958)                       |
| Archaea  | <i>Halopiger xanaduensis</i>         | WP_013875895.1 | NC_015658: 317940..319166                       | WP_013875893.1 | NC_015658: 316670..317503                      |
| Archaea  | <i>Halorubrum lipolyticum</i>        | WP_008006199.1 | NZ_AOJG01000028:<br>107194..108432              | WP_008006198.1 | NZ_AOJG01000028:<br>106361..107194             |
| Archaea  | <i>Halorubrum</i> sp. AJ67           | WP_048076344.1 | NZ_CBVY010000002:<br>complement(283367..284326) | WP_048076337.1 | NZ_CBVY010000002:<br>275883..276716            |
| Archaea  | <i>Halorubrum</i> sp. T3             | WP_017342377.1 | NZ_JH815329: 200507..201730                     | WP_017342376.1 | NZ_JH815329: 199674..200510                    |
| Archaea  | <i>Halostagnicola larsenii</i>       | WP_049954650.1 | NZ_CP007057:<br>complement(61847..63058)        | WP_049954652.1 | NZ_CP007057:<br>complement(63489..64328)       |
| Archaea  | <i>Haloterrigena salina</i>          | WP_008892585.1 | NZ_AOIS01000006:<br>22498..23724                | WP_008892583.1 | NZ_AOIS01000006: 21228..22067                  |
| Archaea  | <i>Haloterrigena turkmenica</i>      | WP_012945082.1 | NC_013744: 244512..245732                       | WP_012945080.1 | NC_013744: 243239..244078                      |
| Archaea  | <i>Natronococcus jeotgali</i>        | WP_008422835.1 | NZ_AOIA01000091:<br>complement(47049..48281)    | WP_008422836.1 | NZ_AOIA01000091:<br>complement(48358..49191)   |
| Archaea  | <i>Natronococcus occultus</i>        | WP_015322307.1 | NC_019974:<br>complement(3041141..3042349)      | WP_015322308.1 | NC_019974:<br>complement(3042351..3043184)     |
| Archaea  | <i>Salinarchaeum</i> sp. Harcht-Bsk1 | WP_020447178.1 | NC_021313:<br>complement(2548572..2549804)      | WP_020447180.1 | NC_021313:<br>complement(2550262..2551098)     |
| Bacteria | <i>[Clostridium] purinilyticum</i>   | WP_050355459.1 | NZ_LGSS01000008:<br>complement(133165..134385)  | WP_050355458.1 | NZ_LGSS01000008:<br>complement(132319..133146) |
| Bacteria | <i>[Clostridium] ultunense</i>       | WP_025640931.1 | NZ_AZSU01000003:<br>25783..27003                | WP_025640932.1 | NZ_AZSU01000003: 27019..27840                  |
| Bacteria | <i>Acetobacter aceti</i>             | WP_010666563.1 | NZ_KB902575:<br>complement(2738095..2739327)    | WP_042788220.1 | NZ_JEOA01000008:<br>complement(134680..135510) |

|          |                                     |                |                                                  |                |                                                  |
|----------|-------------------------------------|----------------|--------------------------------------------------|----------------|--------------------------------------------------|
| Bacteria | <i>Acetobacterium bakii</i>         | WP_050739260.1 | NZ_LGYO01000010:<br>complement(75..1289)         | WP_050741055.1 | NZ_LGYO01000037:<br>complement(13654..14481)     |
| Bacteria | <i>Acetobacterium dehalogenans</i>  | WP_026394826.1 | NZ_AXAC01000024:<br>complement(15466..16674)     | WP_026394825.1 | NZ_AXAC01000024:<br>complement(14610..15437)     |
| Bacteria | <i>Acetobacterium woodii</i>        | WP_014356784.1 | NC_016894:<br>complement(2836836..2838044)       | WP_014356783.1 | NC_016894:<br>complement(2835762..2836589)       |
| Bacteria | <i>Acetonema longum</i>             | WP_004092559.1 | NZ_AFGF01000017:<br>113615..114832               | WP_004092562.1 | NZ_AFGF01000017:<br>114858..115685               |
| Bacteria | <i>Acholeplasma equifetale</i>      | WP_026399708.1 | NZ_JHXL01000002:<br>156328..157542               | WP_026399709.1 | NZ_JHXL01000002:<br>157563..158390               |
| Bacteria | <i>Achromobacter arsenitoxydans</i> | WP_008160625.1 | NZ_AGUF01000033:<br>complement(38162..39373)     | WP_008160622.1 | NZ_AGUF01000033:<br>complement(37320..38150)     |
| Bacteria | <i>Achromobacter insuavis</i>       | WP_006396077.1 | NZ_GL982453:<br>complement(6688402..6689613)     | WP_006396076.1 | NZ_GL982453:<br>complement(6687560..6688390)     |
| Bacteria | <i>Achromobacter</i> sp. DH1f       | WP_025135787.1 | NZ_AYMF01000006:<br>152899..154110               | WP_025135788.1 | NZ_AYMF01000006:<br>154122..154952               |
| Bacteria | <i>Achromobacter</i> sp. LC458      | WP_046804746.1 | NZ_LBHW01000012:<br>complement(119021..120235)   | WP_046804745.1 | NZ_LBHW01000012:<br>complement(118148..118978)   |
| Bacteria | <i>Achromobacter</i> sp. Root170    | WP_056324149.1 | NZ_LMHN01000015:<br>656281..657492               | WP_056324151.1 | NZ_LMHN01000015:<br>657504..658334               |
| Bacteria | <i>Achromobacter</i> sp. Root565    | WP_056562789.1 | NZ_LMGO01000001:<br>complement(2253092..2254303) | WP_056562787.1 | NZ_LMGO01000001:<br>complement(2252249..2253079) |
| Bacteria | <i>Achromobacter</i> sp. Root83     | WP_057282520.1 | NZ_LMIU01000001:<br>371183..372394               | WP_057282521.1 | NZ_LMIU01000001:<br>372406..373236               |
| Bacteria | <i>Achromobacter</i> sp. RTa        | WP_043542239.1 | NZ_JPYO01000007:<br>complement(88647..89858)     | WP_043542238.1 | NZ_JPYO01000007:<br>complement(87805..88635)     |

|          |                                       |                |                                                |                |                                                |
|----------|---------------------------------------|----------------|------------------------------------------------|----------------|------------------------------------------------|
| Bacteria | <i>Achromobacter spanius</i>          | WP_050445146.1 | NZ_LGVG01000002:<br>123856..125076             | WP_050445147.1 | NZ_LGVG01000002:<br>125088..125918             |
| Bacteria | <i>Acidisphaera rubrifaciens</i>      | WP_048860690.1 | NZ_BANB01000165:<br>complement(15908..18109)   | WP_048860689.1 | NZ_BANB01000165:<br>complement(15072..15905)   |
| Bacteria | <i>Actinomadura madurae</i>           | WP_024934958.1 | NZ_AWOO02000017:<br>38177..39373               | WP_021598830.1 | NZ_AWOO02000017:<br>39370..40191               |
| Bacteria | <i>Actinomadura oligospora</i>        | WP_026413235.1 | NZ_JADG01000010:<br>complement(136557..137765) | WP_026413234.1 | NZ_JADG01000010:<br>complement(135730..136560) |
| Bacteria | <i>Actinomadura rifamycini</i>        | WP_034518040.1 | NZ_AULB01000015: 8167..9420                    | WP_026402685.1 | NZ_AULB01000015: 9417..10232                   |
| Bacteria | <i>Actinomycespora chiangmaiensis</i> | WP_018330347.1 | NZ_KB903217: 157645..158829                    | WP_018330348.1 | NZ_KB903217: 158826..159656                    |
| Bacteria | <i>Actinopolyspora erythraea</i>      | WP_043572596.1 | NZ_KN214175:<br>complement(429484..430686)     | WP_043572594.1 | NZ_KN214175:<br>complement(428619..429428)     |
| Bacteria | <i>Actinopolyspora halophila</i>      | WP_017974240.1 | NZ_AQUI01000002:<br>1977510..1978709           | WP_026152270.1 | NZ_AQUI01000002:<br>1978739..1979584           |
| Bacteria | <i>Actinopolyspora iraqiensis</i>     | WP_026453720.1 | NZ_KE387069:<br>complement(33433..34629)       | WP_026453719.1 | NZ_KE387069:<br>complement(32589..33431)       |
| Bacteria | <i>Actinopolyspora mortivallis</i>    | WP_026449078.1 | NZ_KB913024:<br>complement(2222242..2223441)   | WP_026449077.1 | NZ_KB913024:<br>complement(2221388..2222194)   |
| Bacteria | <i>Agrobacterium tumefaciens</i>      | WP_026449078.1 | NZ_KB913024:<br>complement(2222242..2223441)   | WP_026449077.1 | NZ_KB913024:<br>complement(2221388..2222194)   |
| Bacteria | <i>Ahrensia</i> sp. R2A130            | WP_009465074.1 | NZ_AEEB01000022:<br>complement(16748..18934)   | WP_009465073.1 | NZ_AEEB01000022:<br>complement(15915..16745)   |
| Bacteria | <i>Alicyclobacillus herbarius</i>     | WP_026961414.1 | NZ_AUMH01000005:<br>50538..51791               | WP_026961415.1 | NZ_AUMH01000005:<br>51775..52602               |
| Bacteria | <i>Alkaliphilus oremlandii</i>        | WP_012160057.1 | NC_009922: 2362186..2363412                    | WP_012160058.1 | NC_009922: 2363436..2364257                    |



|          |                                                                  |                |                                                  |                |                                                  |
|----------|------------------------------------------------------------------|----------------|--------------------------------------------------|----------------|--------------------------------------------------|
| Bacteria | <i>Allokutzneria albata</i>                                      | WP_030429097.1 | NZ_JOEF01000005:<br>complement(350819..352057)   | WP_030429096.1 | NZ_JOEF01000005:<br>complement(349995..350822)   |
| Bacteria | <i>Aminiphilus circumscriptus</i>                                | WP_034264082.1 | NZ_JAFY01000001:<br>complement(60161..61357)     | WP_025745587.1 | NZ_JAFY01000001:<br>complement(59264..60094)     |
| Bacteria | <i>Amycolatopsis orientalis</i>                                  | WP_043838740.1 | NZ_ASXH01000167:<br>complement(158270..159514)   | WP_043838739.1 | NZ_ASXH01000167:<br>complement(157462..158283)   |
| Bacteria | <i>Anaerobaculum hydrogeniformans</i>                            | WP_057940748.1 | NZ_ACJX03000001:<br>complement(1097406..1098617) | WP_057940747.1 | NZ_ACJX03000001:<br>complement(1096551..1097387) |
| Bacteria | <i>Anaerobaculum mobile</i>                                      | WP_014806018.1 | NC_018024:<br>complement(114293..115501)         | WP_014806017.1 | NC_018024:<br>complement(113437..114273)         |
| Bacteria | <i>Ancylobacter</i> sp. FA202                                    | WP_018391584.1 | NZ_KB904819:<br>complement(159554..160753)       | WP_018391583.1 | NZ_KB904819:<br>complement(158708..159538)       |
| Bacteria | <i>Arhodomonas aquaeolei</i>                                     | WP_018719490.1 | NZ_KB894821: 42003..43202                        | WP_018719483.1 | NZ_KB894821:<br>complement(35004..35831)         |
| Bacteria | <i>Arsenophonus endosymbiont</i> of<br><i>Nilaparvata lugens</i> | WP_032116615.1 | NZ_KN173624:<br>complement(8203..9420)           | WP_032116614.1 | NZ_KN173624:<br>complement(7357..8187)           |
| Bacteria | <i>Arsenophonus nasoniae</i>                                     | WP_026822523.1 | NZ_AUCC01000022:<br>complement(30880..32097)     | WP_026822522.1 | NZ_AUCC01000022:<br>complement(30034..30864)     |
| Bacteria | <i>Aurantimonas coralicida</i>                                   | WP_024350891.1 | NZ_BBWN01000017:<br>85938..88103                 | WP_029703199.1 | NZ_BBWN01000017:<br>88106..88954                 |
| Bacteria | <i>Azospirillum halopraeferens</i>                               | WP_029010042.1 | NZ_AUCF01000033: 7951..9207                      | WP_029010043.1 | NZ_AUCF01000033: 9209..10045                     |
| Bacteria | <i>Bacillus farraginis</i>                                       | WP_058004866.1 | NZ_LMCA01000015:<br>25045..26256                 | WP_058004867.1 | NZ_LMCA01000015:<br>26272..27096                 |
| Bacteria | <i>Bacillus massilioanorexius</i>                                | WP_019244219.1 | NZ_CAPG01000088:<br>10405..11637                 | WP_026089424.1 | NZ_CAPG01000088: 11625..12455                    |

|          |                                                                |                |                                                  |                |                                                  |
|----------|----------------------------------------------------------------|----------------|--------------------------------------------------|----------------|--------------------------------------------------|
| Bacteria | <i>Bacillus megaterium</i>                                     | WP_026682232.1 | NZ_KI518608:<br>complement(94781..96007)         | WP_026682231.1 | NZ_KI518608:<br>complement(93955..94779)         |
| Bacteria | <i>Bacillus</i> sp. FJAT-18019                                 | WP_053491715.1 | NZ_LITP01000001:<br>Unknown                      | WP_053491716.1 | NZ_LITP01000001:<br>Unknown                      |
| Bacteria | <i>Bacillus</i> sp. UNC438CL73TsuS30                           | WP_026572856.1 | NZ_AXVA01000011:<br>22971..24212                 | WP_026572857.1 | NZ_AXVA01000011:<br>24199..25041                 |
| Bacteria | <i>Bacillus thermoamylovorans</i>                              | WP_034767191.1 | NZ_CCRF01000009: 22069..23295                    | WP_034767194.1 | NZ_CCRF01000009: 23296..24126                    |
| Bacteria | bacteria symbiont BFo1 of<br><i>Frankliniella occidentalis</i> | WP_048917260.1 | /                                                | WP_048917259.1 | /                                                |
| Bacteria | bacterium mt3                                                  | WP_054949746.1 | NZ_CTDZ01000009:<br>complement(1382501..1383742) | WP_054949745.1 | NZ_CTDZ01000009:<br>complement(1381659..1382477) |
| Bacteria | bacterium UASB270                                              | WP_045434693.1 | /                                                | WP_045434691.1 | /                                                |
| Bacteria | <i>Belnapia moabensis</i>                                      | WP_043340154.1 | NZ_JQKB01000025: 72844..74061                    | WP_043340156.1 | NZ_JQKB01000025: 74042..74872                    |
| Bacteria | <i>Beutenbergia cavernae</i>                                   | WP_015884276.1 | NC_012669:<br>Unknown                            | WP_015884275.1 | NC_012669:<br>Unknown                            |
| Bacteria | <i>Bilophila wadsworthia</i>                                   | WP_005027753.1 | NZ_KE150238:<br>161393..162586                   | WP_005027754.1 | NZ_KE150238: 162640..163467                      |
| Bacteria | <i>Bordetella bronchiseptica</i><br>99-R-0433                  | WP_033465887.1 | NZ_JGWN01000100:<br>complement(37424..38632)     | WP_003810459.1 | NZ_JGWN01000100:<br>complement(36584..37414)     |
| Bacteria | <i>Bordetella parapertussis</i><br>a                           | WP_010928219.1 | NZ_LRII01000001:<br>complement(1106629..1107837) | WP_010928220.1 | NZ_LRII01000001:<br>complement(1105789..1106619) |
| Bacteria | <i>Bordetella pertussis</i> strain I475                        | WP_010930245.1 | NZ_CP010347:<br>complement(1724001..1725209)     | WP_010930246.1 | NZ_CP010347:<br>complement(1723161..1723991)     |
| Bacteria | <i>Bosea</i> sp. AAP35                                         | WP_054141202.1 | NZ_LJHQ01000003:<br>complement(288970..291210)   | WP_054141413.1 | NZ_LJHQ01000003:<br>complement(288086..288961)   |

|          |                                      |                |                                                |                |                                                |
|----------|--------------------------------------|----------------|------------------------------------------------|----------------|------------------------------------------------|
| Bacteria | <i>Bosea</i> sp. Root483D1           | WP_057191436.1 | NZ_LMJW01000020:<br>265882..268116             | WP_057191437.1 | NZ_LMJW01000020:<br>268113..268988             |
| Bacteria | <i>Bradyrhizobium lablabi</i>        | WP_057856136.1 | NZ_LLYB01000033:<br>complement(9942..12179)    | WP_057856135.1 | NZ_LLYB01000033:<br>complement(9106..9939)     |
| Bacteria | <i>Bradyrhizobium manausense</i>     | WP_057758767.1 | NZ_LJYG01000112:<br>628115..630331             | WP_057758769.1 | NZ_LJYG01000112:<br>630335..631168             |
| Bacteria | <i>Bradyrhizobium oligotrophicum</i> | WP_015666016.1 | NC_020453: 3259529..3261745                    | WP_042339458.1 | NC_020453: 3261751..3262596                    |
| Bacteria | <i>Bradyrhizobium</i> sp. Ai1a-2     | WP_027578857.1 | NZ_AUEZ01000006:<br>complement(124589..126805) | WP_027578856.1 | NZ_AUEZ01000006:<br>complement(123752..124585) |
| Bacteria | <i>Bradyrhizobium</i> sp. BTAi1      | WP_012044823.1 | NC_009485:<br>complement(5049586..5051805)     | WP_012044822.1 | NC_009485:<br>complement(5048735..5049580)     |
| Bacteria | <i>Bradyrhizobium</i> sp. DOA9       | WP_025035422.1 | NZ_DF820425:<br>complement(3956602..3958812)   | WP_025035421.1 | NZ_DF820425:<br>complement(3955765..3956598)   |
| Bacteria | <i>Bradyrhizobium</i> sp. LTSP849    | WP_045010848.1 | NZ_JYMR01000012:<br>293154..295370             | WP_045010849.1 | NZ_JYMR01000012:<br>295374..296207             |
| Bacteria | <i>Bradyrhizobium</i> sp. LTSP857    | WP_045001001.1 | NZ_JYMS01000007:<br>765046..767262             | WP_045001003.1 | NZ_JYMS01000007:<br>767266..768099             |
| Bacteria | <i>Bradyrhizobium</i> sp. ORS 278    | WP_011927607.1 | NC_009445:<br>complement(4975423..4977642)     | WP_011927606.1 | NC_009445:<br>complement(4974572..4975417)     |
| Bacteria | <i>Bradyrhizobium</i> sp. ORS 285    | WP_006609916.1 | NZ_CAFH01000027:<br>70496..72715               | WP_006609917.1 | NZ_CAFH01000027: 72721..73566                  |
| Bacteria | <i>Bradyrhizobium</i> sp. ORS 375    | WP_009028479.1 | NZ_CAFI01000186:<br>complement(7416..9635)     | WP_009028478.1 | NZ_CAFI01000186:<br>complement(6566..7411)     |
| Bacteria | <i>Bradyrhizobium</i> sp. S23321     | WP_015686994.1 | NC_017082: 4608432..4610648                    | WP_015686995.1 | NC_017082: 4610652..4611485                    |
| Bacteria | <i>Bradyrhizobium</i> sp. STM 3809   | WP_008965116.1 | NZ_CAFJ01000590:                               | WP_008965115.1 | NZ_CAFJ01000590:                               |

|          |                                            |                |                                                |                |                                                |
|----------|--------------------------------------------|----------------|------------------------------------------------|----------------|------------------------------------------------|
|          |                                            |                | complement(20161..22380)                       |                | complement(19310..20155)                       |
| Bacteria | <i>Bradyrhizobium</i> sp. Tv2a-2           | WP_024519131.1 | NZ_AXAI01000017: 39390..41606                  | WP_024519132.1 | NZ_AXAI01000017: 41609..42442                  |
| Bacteria | <i>Bradyrhizobium</i> sp. WSM2254          | WP_027548900.1 | NZ_KI421445: 205545..207761                    | WP_027548901.1 | NZ_KI421445: 207765..208598                    |
| Bacteria | <i>Bradyrhizobium</i> sp. WSM3983          | WP_027531282.1 | NZ_AXAY01000007:<br>complement(238883..241099) | WP_027531281.1 | NZ_AXAY01000007:<br>complement(238046..238879) |
| Bacteria | <i>Bradyrhizobium</i> sp. WSM471           | WP_007608672.1 | NZ_CM001442:<br>complement(3517274..3519487)   | WP_007608671.1 | NZ_CM001442:<br>complement(3516437..3517270)   |
| Bacteria | <i>Bradyrhizobium</i> sp. YR681            | WP_008139382.1 | NZ_AKIY01000238:<br>complement(3741..5957)     | WP_035966605.1 | NZ_AKIY01000238:<br>complement(2904..3737)     |
| Bacteria | <i>Bradyrhizobium valentinum</i>           | WP_057855913.1 | NZ_LLXY01000090:<br>55138..57375               | WP_057855912.1 | NZ_LLXY01000090: 57378..58211                  |
| Bacteria | <i>Brenneria goodwinii</i>                 | WP_048635954.1 | NZ_CGIG01000001:<br>complement(501747..502958) | WP_048635953.1 | NZ_CGIG01000001:<br>complement(500904..501734) |
| Bacteria | <i>Brevibacillus reuszeri</i>              | WP_049741171.1 | NZ_LGIQ01000011:<br>complement(39734..40981)   | WP_049741170.1 | NZ_LGIQ01000011:<br>complement(38914..39747)   |
| Bacteria | <i>Budvicia aquatica</i>                   | WP_029096836.1 | NZ_KE386588: 166622..167833                    | WP_029096837.1 | NZ_KE386588: 167843..168673                    |
| Bacteria | <i>Burkholderia mallei</i> ATCC 23344      | WP_004206762.1 | NZ_LUFP01000085: 34025..35242                  | WP_004201924.1 | NZ_LUFP01000085: 35245..36087                  |
| Bacteria | <i>Burkholderia oklahomensis</i>           | WP_010109433.1 | NZ_LOST01000093:<br>complement(150558..151775) | WP_038801540.1 | NZ_LOST01000093:<br>complement(149713..150555) |
| Bacteria | <i>Burkholderia pseudomallei</i> K96243    | WP_004546897.1 | NZ_CM003195:<br>complement(2362803..2364020)   | WP_004200988.1 | /                                              |
| Bacteria | <i>Caldibacillus debilis</i>               | WP_020156886.1 | NZ_KB912918: 33509..34747                      | WP_026500106.1 | NZ_KB912918: 34731..35561                      |
| Bacteria | <i>Candidatus Puniceispirillum marinum</i> | WP_013046653.1 | NC_014010:<br>complement(1982938..1984158)     | WP_013046651.1 | NC_014010:<br>complement(1982090..1982923)     |

|          |                                              |                |                                              |                |                                              |
|----------|----------------------------------------------|----------------|----------------------------------------------|----------------|----------------------------------------------|
| Bacteria | <i>Centipeda periodontii</i>                 | WP_006305316.1 | NZ_GL892076:<br>complement(514734..515963)   | WP_006305315.1 | NZ_GL892076:<br>complement(513882..514712)   |
| Bacteria | <i>Chelativorans</i> sp. BNC1                | WP_011583028.1 | NC_008254:<br>complement(4012583..4013815)   | WP_011583027.1 | NC_008254:<br>complement(4011727..4012590)   |
| Bacteria | <i>Clostridium argentinense</i>              | WP_039633725.1 | NZ_AYSO01000017:<br>281060..282271           | WP_039633727.1 | NZ_AYSO01000017:<br>282288..283115           |
| Bacteria | <i>Clostridium botulinum</i> A str. ATCC 449 | WP_011949085.1 | NZ_LFOO01000006: 60850..62058                | WP_011949086.1 | NZ_LFOO01000006: 62083..62913                |
| Bacteria | <i>Clostridium drakei</i>                    | WP_032078519.1 | NZ_JIBU02000038: 6629..7837                  | WP_032078520.1 | NZ_JIBU02000038: 7866..8696                  |
| Bacteria | <i>Clostridium neonatale</i>                 | WP_058296486.1 | NZ_LN890328:<br>complement(2624965..2626173) | WP_058296485.1 | NZ_LN890328:<br>complement(2623989..2624819) |
| Bacteria | <i>Clostridium polynesiense</i>              | WP_040211079.1 | NZ_CCXI01000040: 8333..9544                  | WP_040211080.1 | NZ_CCXI01000040: 9655..10485                 |
| Bacteria | <i>Clostridium scatologenes</i>              | WP_029162168.1 | NZ_CP009933: 112528..113736                  | WP_029162167.1 | NZ_CP009933: 113766..114596                  |
| Bacteria | <i>Clostridium</i> sp. L74                   | WP_053469563.1 | NZ_LITJ01000078:<br>278701..279909           | WP_053469564.1 | NZ_LITJ01000078:<br>279934..280764           |
| Bacteria | <i>Clostridium</i> sp. M62/1                 | WP_008399240.1 | NZ_GG730317: 119406..120617                  | WP_008399242.1 | NZ_GG730317: 120661..121488                  |
| Bacteria | <i>Clostridium sulfidigenes</i>              | WP_035135472.1 | NZ_JPMD01000050:<br>complement(28487..29695) | WP_035135469.1 | NZ_JPMD01000050:<br>complement(27617..28447) |
| Bacteria | <i>Coprothermobacter platensis</i>           | WP_018963759.1 | NZ_KB899040:<br>complement(1268378..1269610) | WP_018963758.1 | NZ_KB899040:<br>complement(1267531..1268361) |
| Bacteria | <i>Coprothermobacter proteolyticus</i>       | WP_012544577.1 | NC_011295:<br>complement(1409623..1410855)   | WP_012543487.1 | NC_011295:<br>complement(1408778..1409608)   |
| Bacteria | <i>Corynebacterium accolens</i>              | WP_005281904.1 | NZ_GL397138:<br>complement(833939..835156)   | WP_005281903.1 | NZ_GL397138:<br>complement(833076..833903)   |

|          |                                         |                |                                                |                |                                                |
|----------|-----------------------------------------|----------------|------------------------------------------------|----------------|------------------------------------------------|
| Bacteria | <i>Corynebacterium</i> sp. KPL1818      | WP_023030825.1 | NZ_KI515760:<br>complement(36227..37444)       | WP_023030824.1 | NZ_KI515760:<br>complement(35364..36191)       |
| Bacteria | <i>Cryptosporangium arvum</i>           | WP_035859346.1 | NZ_KK073874:<br>complement(9085595..9086818)   | WP_035859344.1 | NZ_KK073874:<br>complement(9084774..9085598)   |
| Bacteria | <i>Dermabacter hominis</i>              | WP_034371397.1 | NZ_KN323183:<br>complement(773059..774300)     | WP_034371394.1 | NZ_KN323183:<br>complement(772230..773057)     |
| Bacteria | <i>Dermabacter</i> sp. HFH0086          | WP_016663580.1 | NZ_KE340308:<br>complement(718147..719388)     | WP_016663579.1 | NZ_KE340308:<br>complement(717318..718145)     |
| Bacteria | <i>Dethiosulfovibrio peptidovorans</i>  | WP_005659904.1 | NZ_ABTR02000001:<br>complement(872164..873360) | WP_050771353.1 | NZ_ABTR02000001:<br>complement(871315..872100) |
| Bacteria | <i>Devosia</i> sp. LC5                  | WP_035102221.1 | NZ_JNNO01000034:<br>complement(201327..202523) | WP_035102218.1 | NZ_JNNO01000034:<br>complement(200474..201316) |
| Bacteria | <i>Dickeya paradisiaca</i>              | WP_015854705.1 | NZ_CM001857:<br>complement(3496945..3498159)   | WP_015854704.1 | NZ_CM001857:<br>complement(3496104..3496934)   |
| Bacteria | <i>Elioraea tepidiphila</i>             | WP_019014842.1 | NZ_KB899922:<br>complement(81354..82550)       | WP_019014841.1 | NZ_KB899922:<br>complement(80521..81351)       |
| Bacteria | <i>Ensifer</i> sp. BR816                | WP_018240310.1 | NZ_KB905371: 109552..110760                    | WP_018240311.1 | NZ_KB905371: 110738..111607                    |
| Bacteria | <i>Ensifer</i> sp. USDA 6670            | WP_029963118.1 | NZ_ATWE01000018:<br>complement(10479..11717)   | WP_029963116.1 | NZ_ATWE01000018:<br>complement(9668..10510)    |
| Bacteria | <i>Enterobacter</i> sp. Bisph2          | WP_039077961.1 | NZ_JXAF01000025: 21962..23179                  | WP_039077962.1 | NZ_JXAF01000025: 23196..24023                  |
| Bacteria | <i>Enterobacteriaceae</i> bacterium B14 | WP_034864638.1 | NZ_DF158885:<br>complement(127016..128227)     | WP_034864637.1 | NZ_DF158885:<br>complement(126172..127002)     |
| Bacteria | <i>Enterococcus caccae</i>              | WP_010771167.1 | NZ_KE136473:<br>complement(217290..218519)     | WP_010771166.1 | NZ_KE136473:<br>complement(216212..217036)     |
| Bacteria | <i>Enterococcus hirae</i>               | WP_048720096.1 | NZ_JUPQ01000406: 1..937                        | WP_048720099.1 | NZ_JUPQ01000406: 941..1771                     |

|          |                                    |                |                                                  |                |                                                  |
|----------|------------------------------------|----------------|--------------------------------------------------|----------------|--------------------------------------------------|
| Bacteria | <i>Enterococcus phoeniculicola</i> | WP_010770070.1 | NZ_KB946329:<br>complement(1312489..1313706)     | WP_010770069.1 | NZ_KB946329:<br>complement(1311645..1312472)     |
| Bacteria | <i>Erwinia iniecta</i>             | WP_052899396.1 | NZ_JRXE01000014: 4584..5804                      | WP_052899397.1 | NZ_JRXE01000014: 5807..6637                      |
| Bacteria | <i>Erwinia mallotivora</i>         | WP_034940156.1 | NZ_JFHN01000065:<br>complement(41458..42678)     | WP_052018928.1 | NZ_JFHN01000065:<br>complement(40628..41413)     |
| Bacteria | <i>Erwinia oleae</i>               | WP_034944728.1 | NZ_JNVB01000011:<br>complement(70161..71387)     | WP_034944725.1 | NZ_JNVB01000011:<br>complement(69332..70159)     |
| Bacteria | <i>Erwinia</i> sp. 9145            | WP_034916896.1 | NZ_JQNE01000001:<br>complement(3156479..3157705) | WP_034916894.1 | NZ_JQNE01000001:<br>complement(3156650..3156477) |
| Bacteria | <i>Erwinia toletana</i>            | WP_017803477.1 | NZ_KB372811: 7819..9039                          | WP_017803478.1 | NZ_KB372811: 9042..9872                          |
| Bacteria | <i>Erwinia tracheiphila</i>        | WP_016190305.1 | NZ_JXNU01000003:<br>complement(1407339..1408559) | WP_016190304.1 | NZ_JXNU01000003:<br>complement(1406509..1407336) |
| Bacteria | <i>Erwinia typographi</i>          | WP_034892276.1 | NZ_JRUQ01000032:<br>complement(45197..46417)     | WP_034892274.1 | NZ_JRUQ01000032:<br>complement(44367..45194)     |
| Bacteria | <i>Ewingella americana</i>         | WP_034795861.1 | NZ_JMPJ01000075: 70003..71217                    | WP_034795864.1 | NZ_JMPJ01000075: 71230..72060                    |
| Bacteria | <i>Flagellimonas</i> sp. DK169     | WP_055392226.1 | NZ_LCTZ01000002:<br>340068..341291               | WP_055392225.1 | NZ_LCTZ01000002:<br>339170..340006               |
| Bacteria | <i>Fodinicurvata fenggangensis</i> | WP_051609388.1 | NZ_JMLV01000011:<br>complement(43471..45729)     | WP_026988277.1 | NZ_JMLV01000011:<br>complement(42651..43484)     |
| Bacteria | <i>Fodinicurvata sediminis</i>     | WP_022728895.1 | NZ_ATVH01000015:<br>312151..314406               | WP_022728896.1 | NZ_ATVH01000015:<br>WP_022728896                 |
| Bacteria | <i>Geminicoccus roseus</i>         | WP_027133359.1 | NZ_KE386572: 1155278..1156468                    | WP_027133360.1 | NZ_KE386572: 1156481..1157317                    |
| Bacteria | <i>Gemmata obscuriglobus</i>       | WP_010037484.1 | NZ_ABGO01000033:<br>complement(34517..35791)     | WP_033198058.1 | NZ_ABGO01000033: 36377..37204                    |

|          |                                       |                |                                              |                |                                              |
|----------|---------------------------------------|----------------|----------------------------------------------|----------------|----------------------------------------------|
| Bacteria | <i>Gemmata</i> sp. IIL30              | WP_052556044.1 | NZ_HG799465: 265004..265543                  | WP_052556040.1 | NZ_HG799465:<br>complement(263460..264287)   |
| Bacteria | <i>Geobacillus subterraneus</i>       | WP_033842841.1 | NZ_JQMN01000001:<br>496411..497649           | WP_033842843.1 | NZ_JQMN01000001:<br>497633..498463           |
| Bacteria | <i>Glaciibacter superstes</i>         | WP_022885534.1 | NZ_ATWH01000008:<br>28285..29538             | WP_022885535.1 | NZ_ATWH01000008:<br>29546..30376             |
| Bacteria | <i>Gluconobacter morbifer</i>         | WP_008851016.1 | NZ_AGQV01000001:<br>896534..897736           | WP_008851017.1 | NZ_AGQV01000001:<br>897739..898569           |
| Bacteria | <i>Halanaerobium hydrogeniformans</i> | WP_013405170.1 | NC_014654: 722275..723489                    | WP_013405171.1 | NC_014654: 723506..724336                    |
| Bacteria | <i>Halanaerobium praevalens</i>       | WP_014553301.1 | NC_017455:<br>complement(1249450..1250667)   | WP_014553300.1 | NC_017455:<br>complement(1248569..1249396)   |
| Bacteria | <i>Halanaerobium saccharolyticum</i>  | WP_005487951.1 | NZ_CAUI01000005:<br>719677..720888           | WP_005487953.1 | NZ_CAUI01000005:<br>720969..721802           |
| Bacteria | <i>Halomonas</i> sp. BC04             | WP_043517802.1 | NZ_AZQX01000356:<br>complement(7714..8934)   | WP_051496655.1 | NZ_AZQX01000356:<br>complement(6884..7672)   |
| Bacteria | <i>Halomonas</i> sp. KM-1             | WP_010626052.1 | NZ_BAEU01000020:<br>complement(1466..2680)   | WP_010626054.1 | NZ_BAEU01000020:<br>complement(3185..4033)   |
| Bacteria | <i>Hoeflea</i> sp. IMCC20628          | WP_047031005.1 | NZ_CP011479:<br>complement(3338068..3339258) | WP_047031004.1 | NZ_CP011479:<br>complement(3337208..3338056) |
| Bacteria | <i>Ideonella</i> sp. 201-F6           | WP_054021909.1 | NZ_BBYR01000065:<br>complement(49124..50365) | WP_054021911.1 | NZ_BBYR01000065:<br>complement(50939..51769) |
| Bacteria | <i>Ilumatobacter nonamiensis</i>      | WP_040494102.1 | NZ_BAOL01000112: 48..1265                    | WP_040494104.1 | NZ_BAOL01000112: 1262..2089                  |
| Bacteria | <i>Jannaschia aquimarina</i>          | WP_043918807.1 | NZ_JYFE01000037:<br>complement(22029..24245) | WP_043918806.1 | NZ_JYFE01000037:<br>WP_043918806             |
| Bacteria | <i>Jiangella muralis</i>              | WP_053207659.1 | NZ_LFXL01000044: 38880..40121                | WP_053207660.1 | NZ_LFXL01000044: 40137..40967                |



|          |                                       |                |                                              |                |                                              |
|----------|---------------------------------------|----------------|----------------------------------------------|----------------|----------------------------------------------|
| Bacteria | <i>Kitasatospora</i> sp. MY 5-36      | WP_049649984.1 | NZ_LFVW01000058:<br>11362..12597             | WP_049649985.1 | NZ_LFVW01000058: 12652..13476                |
| Bacteria | <i>Kluyvera intermedia</i>            | WP_047368997.1 | NZ_CP011602:<br>complement(122100..123317)   | WP_047368996.1 | NZ_CP011602:<br>complement(121256..122083)   |
| Bacteria | <i>Komagataeibacter hansenii</i>      | WP_003621924.1 | NZ_LUCI01000014:<br>complement(22005..23357) | WP_003621921.1 | NZ_LUCI01000014:<br>complement(21175..22005) |
| Bacteria | <i>Komagataeibacter intermedius</i>   | WP_039735226.1 | NZ_BANF01000194:<br>12162..13394             | WP_039735227.1 | NZ_BANF01000194: 13372..14202                |
| Bacteria | <i>Komagataeibacter medellinensis</i> | WP_014106695.1 | NC_016027:<br>complement(3116747..3117988)   | WP_014106694.1 | NC_016027:<br>complement(3115939..3116769)   |
| Bacteria | <i>Komagataeibacter oboediens</i>     | WP_010515931.1 | NZ_CADT01000040: 8854..10086                 | WP_010515933.1 | NZ_CADT01000040: 10064..10894                |
| Bacteria | <i>Kutzneria albida</i>               | WP_025360603.1 | NZ_KL570474: 7554..8771                      | WP_025360604.1 | NZ_KL570474: 8768..9643                      |
| Bacteria | <i>Lachnoanaerobaculum</i> sp. ICM7   | WP_009663593.1 | NZ_ALJL01000027:<br>complement(19130..20347) | WP_009663606.1 | NZ_ALJL01000027:<br>complement(18274..19104) |
| Bacteria | <i>Lachnoanaerobaculum</i> OBRC5-5    | WP_007594527.1 | NZ_JH815185:<br>complement(1950353..1951570) | WP_007594525.1 | NZ_JH815185:<br>complement(1949498..1950328) |
| Bacteria | <i>Lactobacillus mellifer</i>         | WP_046315202.1 | NZ_KQ034028:<br>complement(90298..91512)     | WP_046315200.1 | NZ_KQ034028:<br>complement(89461..90291)     |
| Bacteria | <i>Leminorella grimontii</i>          | WP_027274915.1 | NZ_JMPN01000018:<br>complement(31414..32628) | WP_027274916.1 | NZ_JMPN01000018:<br>complement(30574..31401) |
| Bacteria | <i>Listeria aquatica</i>              | WP_036072697.1 | NZ_AOCG01000009:<br>complement(75417..76646) | WP_036072693.1 | NZ_AOCG01000009:<br>complement(74591..75424) |
| Bacteria | <i>Lysinibacillus massiliensis</i>    | WP_036179382.1 | NZ_JPVQ01000049: 116..1321                   | WP_036179385.1 | NZ_JPVQ01000049: 1356..2186                  |
| Bacteria | <i>Lysinibacillus xylanilyticus</i>   | WP_049664865.1 | NZ_LFXJ01000005:<br>885230..886489           | WP_049664867.1 | NZ_LFXJ01000005:<br>886452..887276           |

|          |                                     |                |                                               |                |                                               |
|----------|-------------------------------------|----------------|-----------------------------------------------|----------------|-----------------------------------------------|
| Bacteria | <i>Mesorhizobium alhagi</i>         | WP_008833871.1 | NZ_AHAM01000017:<br>complement(57..1253)      | WP_008833870.1 | NZ_AHAM01000016:<br>complement(11655..12479)  |
| Bacteria | <i>Mesorhizobium australicum</i>    | WP_015315629.1 | NC_019973:<br>complement(1769405..1770601)    | WP_015315628.1 | NC_019973:<br>complement(1768538..1769395)    |
| Bacteria | <i>Mesorhizobium erdmanii</i>       | WP_027054358.1 | NZ_AXAE01000023:<br>complement(79112..80308)  | WP_027054357.1 | NZ_AXAE01000023:<br>complement(78235..79101)  |
| Bacteria | <i>Mesorhizobium huakuii</i>        | WP_038649837.1 | NZ_CP006581: 4654363..4655559                 | WP_038649841.1 | NZ_CP006581: 4655570..4656436                 |
| Bacteria | <i>Mesorhizobium metallidurans</i>  | WP_008874201.1 | NZ_CAUM01000060<br>complement(38538..39734)   | WP_008874200.1 | NZ_CAUM01000060<br>complement(37659..38525)   |
| Bacteria | <i>Mesorhizobium</i> sp. LC103      | WP_047146532.1 | NZ_LBCQ01000008<br>151827..154043             | WP_047146533.1 | NZ_LBCQ01000008<br>154048..154878             |
| Bacteria | <i>Mesorhizobium</i> sp. LNHC252B00 | WP_023760836.1 | NZ_AYWO01000017<br>112161..113357             | WP_023760837.1 | NZ_AYWO01000017<br>113368..114240             |
| Bacteria | <i>Mesorhizobium</i> sp. LSHC412B00 | WP_023725044.1 | NZ_AYWB01000001<br>complement(455959..458118) | WP_023725043.1 | NZ_AYWB01000001<br>complement(455119..455958) |
| Bacteria | <i>Mesorhizobium</i> sp. LSJC280B00 | WP_023675174.1 | NZ_AYVL01000004<br>complement(40344..41540)   | WP_023675173.1 | NZ_AYVL01000004<br>complement(39460..40332)   |
| Bacteria | <i>Mesorhizobium</i> sp. ORS3324    | WP_040973801.1 | NZ_CCMY01000176<br>18194..19390               | WP_040973802.1 | NZ_CCMY01000176<br>19403..20257               |
| Bacteria | <i>Mesorhizobium</i> sp. STM 4661   | WP_006328659.1 | NZ_CAAF010000026<br>complement(60304..61500)  | WP_006328658.1 | NZ_CAAF010000026<br>complement(59428..60291)  |
| Bacteria | <i>Mesorhizobium</i> sp. WSM3626    | WP_027144633.1 | NZ_AZUY01000025<br>complement(32590..33786)   | WP_027144632.1 | NZ_AZUY01000025<br>complement(31723..32580)   |
| Bacteria | <i>Methylobacterium variabile</i>   | WP_048444391.1 | NZ_LABY01000073<br>complement(25079..26284)   | WP_048444390.1 | NZ_LABY01000073<br>complement(24232..25074)   |

|          |                                    |                |                                                  |   |                |                                                  |   |
|----------|------------------------------------|----------------|--------------------------------------------------|---|----------------|--------------------------------------------------|---|
| Bacteria | <i>Microbacterium azadirachtae</i> | WP_045272712.1 | NZ_JYIX01000037<br>complement(67805..69040)      | : | WP_045272711.1 | NZ_JYIX01000037<br>complement(66963..67808)      | : |
| Bacteria | <i>Microbacterium</i> sp. Root180  | WP_056122435.1 | NZ_LMHS01000003<br>complement(822474..823694)    | : | WP_056122431.1 | NZ_LMHS01000003<br>complement(821525..822385)    | : |
| Bacteria | <i>Microbispora rosea</i>          | WP_030512351.1 | NZ_JNZQ01000054: 23298..24533                    |   | WP_030512352.1 | NZ_JNZQ01000054: 24535..25365                    |   |
| Bacteria | <i>Micromonospora carbonacea</i>   | WP_043969468.1 | NZ_JX SX01000003<br>complement(1496740..1497963) | : | WP_043968370.1 | NZ_JX SX01000003<br>complement(1495914..1496738) | : |
| Bacteria | <i>Microvirga lupini</i>           | WP_036363895.1 | NZ_KI912036: 54060..55256                        |   | WP_051455428.1 | NZ_KI912036: 55253..56149                        |   |
| Bacteria | <i>Microvirga</i> sp. BSC39        | WP_036345744.1 | NZ_JPUG01000007: 4648..5865                      |   | WP_036345740.1 | NZ_JPUG01000007: 3342..4214                      |   |
| Bacteria | <i>Mycobacterium mageritense</i>   | WP_036435803.1 | NZ_CCBF010000001:<br>4278269..4279522            |   | WP_036433727.1 | NZ_CCBF010000001:<br>4276577..4277413            |   |
| Bacteria | <i>Mycobacterium</i> sp. Root135   | WP_056549661.1 | NZ_LMEZ01000001:<br>complement(381242..382474)   |   | WP_056549658.1 | NZ_LMEZ01000001:<br>complement(380386..381168)   |   |
| Bacteria | <i>Mycobacterium</i> sp. UM_WWY    | WP_029369658.1 | NZ_AUWS01000024:<br>complement(31963..33234)     |   | WP_029369660.1 | NZ_AUWS01000024:<br>complement(34073..34909)     |   |
| Bacteria | <i>Natranaerobius thermophilus</i> | WP_012447345.1 | NC_010718:<br>complement(929018..930235)         |   | WP_012447344.1 | NC_010718:<br>complement(928166..928993)         |   |
| Bacteria | <i>Neorhizobium galegae</i>        | WP_046635121.1 | NZ_CCRG01000053:<br>13374..14585                 |   | WP_046635119.1 | NZ_CCRG01000053:<br>14582..15406                 |   |
| Bacteria | <i>Nesiotobacter exalbescens</i>   | WP_028482711.1 | NZ_KE383918: 443067..444269                      |   | WP_028482712.1 | NZ_KE383918: 444288..445112                      |   |
| Bacteria | <i>Nocardiopsis baichengensis</i>  | WP_017559523.1 | NZ_ANAS01000038:<br>complement(41000..42211)     |   | WP_017559522.1 | NZ_ANAS01000038:<br>complement(40165..40995)     |   |
| Bacteria | <i>Nocardiopsis chromatogenes</i>  | WP_017626150.1 | NZ_ANBH01000243:<br>complement(7572..8664)       |   | WP_017626149.1 | NZ_ANBH01000243:<br>complement(6737..7567)       |   |

|          |                                       |                |                                                |                |                                                |
|----------|---------------------------------------|----------------|------------------------------------------------|----------------|------------------------------------------------|
| Bacteria | <i>Nocardiopsis gilva</i>             | WP_017619322.1 | NZ_ANBG01000236:<br>complement(1570..2823)     | WP_017619321.1 | NZ_ANBG01000236:<br>complement(736..1566)      |
| Bacteria | <i>Nocardiopsis halophila</i>         | WP_017538265.1 | NZ_ANAD01000067: 5981..7183                    | WP_017538266.1 | NZ_ANAD01000067: 7188..8018                    |
| Bacteria | <i>Nocardiopsis potens</i>            | WP_017594438.1 | NZ_ANBB01000045:<br>complement(50559..51815)   | WP_017594437.1 | NZ_ANBB01000045:<br>complement(49666..50496)   |
| Bacteria | <i>Nonomuraea candida</i>             | WP_043627653.1 | NZ_JOAG01000026:<br>149734..150972             | WP_043627655.1 | NZ_JOAG01000026:<br>150969..151784             |
| Bacteria | <i>Nonomuraea coxensis</i>            | WP_020540311.1 | NZ_KB903940: 185115..186356                    | WP_020540312.1 | NZ_KB903940: 186353..187180                    |
| Bacteria | <i>Nonomuraea</i> sp. NBRC 110462     | WP_055501548.1 | NZ_BBZG01000001:<br>848394..849611             | WP_055501549.1 | NZ_BBZG01000001:<br>849608..850429             |
| Bacteria | <i>Nonomuraea</i> sp. SBT364          | WP_049570083.1 | NZ_LAVL01000100:<br>complement(7616..8824)     | WP_049570080.1 | NZ_LAVL01000100:<br>complement(6798..7619)     |
| Bacteria | <i>Noviherbaspirillum</i> sp. Root189 | WP_057293456.1 | NZ_LMHZ01000056:<br>complement(287525..289774) | WP_057293368.1 | NZ_LMHZ01000056:<br>complement(286686..287516) |
| Bacteria | <i>Oceanibaculum indicum</i>          | WP_008942927.1 | NZ_AMRL01000001:<br>complement(342390..343604) | WP_008942929.1 | NZ_AMRL01000001:<br>complement(344083..344928) |
| Bacteria | <i>Oceanicola batsensis</i>           | WP_009804053.1 | NZ_AAMO01000009:<br>85960..87165               | WP_040609010.1 | NZ_AAMO01000009:<br>87167..88030               |
| Bacteria | <i>Oceanicola granulosus</i>          | WP_007257241.1 | NZ_CH724111:<br>complement(127949..129172)     | WP_007257242.1 | NZ_CH724111:<br>complement(129184..130041)     |
| Bacteria | <i>Paenibacillus borealis</i>         | WP_042214031.1 | NZ_CP009285: 4322542..4323759                  | WP_042214033.1 | NZ_CP009285: 4323785..4324615                  |
| Bacteria | <i>Paenibacillus chondroitinus</i>    | WP_047675029.1 | NZ_JUGY01000005:<br>complement(200157..201386) | WP_047675028.1 | NZ_JUGY01000005:<br>complement(199318..200148) |
| Bacteria | <i>Paenibacillus daejeonensis</i>     | WP_020619288.1 | NZ_KB899667: 174483..175718                    | WP_020619290.1 | NZ_KB899667: 176517..177347                    |

|          |                                      |                |                                                |                |                                                |
|----------|--------------------------------------|----------------|------------------------------------------------|----------------|------------------------------------------------|
| Bacteria | <i>Paenibacillus dendritiformis</i>  | WP_006676043.1 | NZ_AHKH01000014:<br>complement(35325..36557)   | WP_006676042.1 | NZ_AHKH01000014:<br>complement(34495..35328)   |
| Bacteria | <i>Paenibacillus ehimensis</i>       | WP_025844271.1 | NZ_JFHX01000001: 49850..51061                  | WP_025844269.1 | NZ_JFHX01000001:<br>complement(48781..49611)   |
| Bacteria | <i>Paenibacillus elgii</i>           | WP_010499345.1 | NZ_AFW01000111:<br>complement(21535..22746)    | WP_010499347.1 | NZ_AFW01000111:<br>22989..23819                |
| Bacteria | <i>Paenibacillus graminis</i>        | WP_025703239.1 | NZ_CP009287:<br>complement(3670351..3671568)   | WP_025703240.1 | NZ_CP009287:<br>complement(3669499..3670329)   |
| Bacteria | <i>Paenibacillus odorifer</i>        | WP_038573570.1 | NZ_CP009428:<br>complement(6306579..6307787)   | WP_038573568.1 | NZ_CP009428:<br>complement(6305699..6306535)   |
| Bacteria | <i>Paenibacillus pini</i>            | WP_036647365.1 | NZ_BAZT01000004:<br>complement(122858..124066) | WP_036647363.1 | NZ_BAZT01000004:<br>complement(122012..122842) |
| Bacteria | <i>Paenibacillus</i> sp. A3          | WP_054973246.1 | NZ_JTHN01000059: 4803..6014                    | WP_054973245.1 | NZ_JTHN01000059:<br>complement(3727..4557)     |
| Bacteria | <i>Paenibacillus</i> sp. A59         | WP_053779421.1 | NZ_LITU01000029:<br>118358..119605             | WP_053779422.1 | NZ_LITU01000029:<br>119598..120428             |
| Bacteria | <i>Paenibacillus</i> sp. AT5         | WP_055107250.1 | NZ_LN884299: 1023218..1024432                  | WP_055107251.1 | NZ_LN884299: 1024475..1025299                  |
| Bacteria | <i>Paenibacillus</i> sp. FJAT-22460  | WP_054404069.1 | NZ_LIUT01000003:<br>complement(420648..421859) | WP_054404068.1 | NZ_LIUT01000003:<br>complement(419768..420598) |
| Bacteria | <i>Paenibacillus</i> sp. FSL H7-0737 | WP_042192346.1 | NZ_CP009279:<br>complement(6242955..6244163)   | WP_042192344.1 | NZ_CP009279:<br>complement(6242075..6242911)   |
| Bacteria | <i>Paenibacillus</i> sp. FSL H8-237  | WP_036678525.1 | NZ_ASPV01000010: 41928..43136                  | WP_036678527.1 | NZ_ASPV01000010: 43180..44016                  |
| Bacteria | <i>Paenibacillus</i> sp. FSL P4-0081 | WP_042137505.1 | NZ_CP009280: 4327624..4328847                  | WP_042137507.1 | NZ_CP009280: 4328867..4329697                  |
| Bacteria | <i>Paenibacillus</i> sp. FSL R5-0345 | WP_042131317.1 | NZ_CP009281:                                   | WP_042131316.1 | NZ_CP009281:                                   |

|          |                                      |                |                                                |                |                                                |
|----------|--------------------------------------|----------------|------------------------------------------------|----------------|------------------------------------------------|
|          |                                      |                | complement(6259982..6261190)                   |                | complement(6259104..6259940)                   |
| Bacteria | <i>Paenibacillus</i> sp. FSL R5-0912 | WP_042236594.1 | NZ_CP009282: 4046792..4048012                  | WP_042236596.1 | NZ_CP009282: 4048032..4048862                  |
| Bacteria | <i>Paenibacillus</i> sp. FSL R5-808  | WP_036642618.1 | NZ_ASPT01000035:<br>complement(49713..50924)   | WP_036642616.1 | NZ_ASPT01000035:<br>complement(48824..49654)   |
| Bacteria | <i>Paenibacillus</i> sp. FSL R7-269  | WP_036690714.1 | NZ_ASPTS01000006: 45242..46459                 | WP_036690716.1 | NZ_ASPTS01000006: 46486..47316                 |
| Bacteria | <i>Paenibacillus</i> sp. FSL R7-277  | WP_036727016.1 | NZ_ASPTX01000058:<br>complement(3996..5213)    | WP_036727015.1 | NZ_ASPTX01000058:<br>complement(3140..3970)    |
| Bacteria | <i>Paenibacillus</i> sp. HGF5        | WP_036673086.1 | NZ_AEXS01000141: 23258..24469                  | WP_009593972.1 | NZ_AEXS01000141: 24525..25355                  |
| Bacteria | <i>Paenibacillus</i> sp. IHB B 3415  | WP_039292079.1 | NZ_JUEI01000002:<br>complement(180813..182030) | WP_039292076.1 | NZ_JUEI01000002:<br>complement(179959..180789) |
| Bacteria | <i>Paenibacillus</i> sp. IHBB 10380  | WP_044877313.1 | NZ_CP010976: 2515877..2517088                  | WP_044877314.1 | NZ_CP010976: 2517096..2517929                  |
| Bacteria | <i>Paenibacillus</i> sp. MSt1        | WP_036685340.1 | NZ_JNVM01000016:<br>21137..22348               | WP_036685948.1 | NZ_JNVM01000016:<br>complement(20067..20900)   |
| Bacteria | <i>Paenibacillus</i> sp. OSY-SE      | WP_019423717.1 | NZ_ALKF01000199:<br>complement(45049..46257)   | WP_019423716.1 | NZ_ALKF01000199:<br>complement(44195..45028)   |
| Bacteria | <i>Paenibacillus</i> sp. P1XP2       | WP_036714087.1 | NZ_JRNV01000049:<br>complement(29261..30487)   | WP_036714086.1 | NZ_JRNV01000049:<br>complement(28405..29229)   |
| Bacteria | <i>Paenibacillus</i> sp. Soil787     | WP_056830177.1 | NZ_LMSP01000003:<br>complement(174558..175787) | WP_056830174.1 | NZ_LMSP01000003:<br>complement(173719..174549) |
| Bacteria | <i>Paenibacillus</i> sp. UNC217MF    | WP_036666684.1 | NZ_JMLT01000008:<br>complement(345441..346685) | WP_028531564.1 | NZ_JMLT01000008:<br>complement(344608..345444) |
| Bacteria | <i>Paenibacillus taiwanensis</i>     | WP_028544866.1 | NZ_KE384306: 139665..140873                    | WP_028544867.1 | NZ_KE384306: 140951..141781                    |
| Bacteria | <i>Paenibacillus vortex</i>          | WP_006212407.1 | NZ_ADHJ01000048:<br>complement(22462..23292)   | WP_006212406.1 | NZ_ADHJ01000048:<br>complement(22462..23292)   |

|          |                                     |                |                                                  |                |                                                  |
|----------|-------------------------------------|----------------|--------------------------------------------------|----------------|--------------------------------------------------|
| Bacteria | <i>Pantoea</i> sp. IMH              | WP_024965815.1 | NZ_JFGT01000002:<br>complement(1101641..1102858) | WP_024965814.1 | NZ_JFGT01000002:<br>complement(1100811..1101638) |
| Bacteria | <i>Pantoea</i> sp. PSNIH2           | WP_038624200.1 | NZ_CP009866: 345055..346281                      | WP_038624202.1 | NZ_CP009866: 346284..347114                      |
| Bacteria | <i>Pedosphaera parvula</i>          | WP_007412607.1 | NZ_ABOX02000001:<br>complement(145151..146377)   | WP_007418550.1 | NZ_ABOX02000069: 17678..18568                    |
| Bacteria | <i>Pelobacter seleniigenes</i>      | WP_029915664.1 | NZ_JOMG01000002:<br>complement(2159813..2161009) | WP_029915662.1 | NZ_JOMG01000002:<br>complement(2158941..2159771) |
| Bacteria | <i>Pelosinus fermentans</i>         | WP_007958223.1 | NZ_CP010978:<br>3564263..3564523                 | WP_007958222.1 | NZ_CP010978:<br>complement(3563403..3564230)     |
| Bacteria | <i>Peptoniphilus obesi</i>          | WP_019131758.1 | NZ_HE978580:<br>complement(166549..167766)       | WP_019131757.1 | NZ_HE978580:<br>complement(165690..166520)       |
| Bacteria | <i>Photorhabdus heterorhabditis</i> | WP_054475940.1 | NZ_LJCS01000004: 62373..63593                    | WP_054481442.1 | NZ_LJCS01000103:<br>complement(6779..7609)       |
| Bacteria | <i>Pirellula staleyi</i>            | WP_012911825.1 | NC_013720: 3753976..3755217                      | WP_012911826.1 | NC_013720: 3755335..3756174                      |
| Bacteria | <i>Plantibacter</i> sp. Leaf314     | WP_056010795.1 | NZ_LMOB01000001:<br>2680455..2681759             | WP_056010798.1 | NZ_LMOB01000001:<br>2681762..2682586             |
| Bacteria | <i>Pleomorphomonas oryzae</i>       | WP_026792166.1 | NZ_AUHB01000011:<br>38325..39539                 | WP_026792167.1 | NZ_AUHB01000011: 39556..40389                    |
| Bacteria | <i>Pontibacillus litoralis</i>      | WP_036833306.1 | NZ_AVPG01000006:<br>complement(65006..66244)     | WP_036833304.1 | NZ_AVPG01000006:<br>complement(64192..65022)     |
| Bacteria | <i>Pragia fontium</i>               | WP_047781684.1 | NZ_CP010423: 3072178..3073389                    | WP_047781088.1 | NZ_CP010423: 2238410..2239237                    |
| Bacteria | <i>Prauserella</i> sp. Am3          | WP_039505285.1 | NZ_JTJI01000015: 53965..55197                    | WP_039505289.1 | NZ_JTJI01000015: 55199..56047                    |
| Bacteria | <i>Propionibacterium acnes</i>      | WP_023487410.1 | NZ_APCV01000094:<br>26451..27143                 | WP_032504493.1 | NZ_AODA01000029:<br>56021..56869                 |

|          |                                       |                |                                              |                |                                              |
|----------|---------------------------------------|----------------|----------------------------------------------|----------------|----------------------------------------------|
| Bacteria | <i>Propionibacterium propionicum</i>  | WP_014847830.1 | NC_018142:<br>complement(3157174..3158394)   | WP_014847829.1 | NC_018142:<br>complement(3156332..3157162)   |
| Bacteria | <i>Propionimicrobium lymphophilum</i> | WP_016455352.1 | NZ_KE150269:<br>complement(536728..537954)   | WP_016455351.1 | NZ_KE150269:<br>complement(535877..536704)   |
| Bacteria | <i>Propionispira raffinosivorans</i>  | WP_019551997.1 | NZ_KB905839: 223309..224514                  | WP_019551998.1 | NZ_KB905839: 224548..225378                  |
| Bacteria | <i>Proteus hauseri</i>                | WP_036911644.1 | NZ_AWXP01000001:<br>54706..55917             | WP_036911647.1 | NZ_AWXP01000001:<br>55934..56761             |
| Bacteria | <i>Proteus vulgaris</i>               | WP_036932833.1 | NZ_KN150745: 231652..232863                  | WP_036932835.1 | NZ_KN150745: 232880..233707                  |
| Bacteria | <i>Providencia burhodogranariaea</i>  | WP_008910137.1 | NZ_KB233222:<br>complement(96776..97999)     | WP_008910136.1 | NZ_KB233222:<br>complement(95938..96765)     |
| Bacteria | <i>Providencia rustigianii</i>        | WP_039855185.1 | NZ_GG703819: 546753..547970                  | WP_006815178.1 | NZ_GG703819: 547985..548812                  |
| Bacteria | <i>Providencia sneebia</i>            | WP_008916532.1 | NZ_CM00177: 3319601..3320824                 | WP_008916533.1 | NZ_CM00177: 3320835..3321662                 |
| Bacteria | <i>Pseudonocardia asaccharolytica</i> | WP_037040531.1 | NZ_JNYD01000003: 54714..55898                | WP_051233149.1 | NZ_AUII01000013:<br>complement(61007..61798) |
| Bacteria | <i>Pseudonocardia dioxanivorans</i>   | WP_013676470.1 | NC_015312:<br>complement(4725911..4727098)   | WP_013676469.1 | NC_015312:<br>complement(4725042..4725914)   |
| Bacteria | <i>Pseudonocardia</i> sp. P1          | WP_010239421.1 | NZ_ADUJ01000708: 302..1504                   | WP_010239424.1 | NZ_ADUJ01000708: 1501..2334                  |
| Bacteria | <i>Pseudonocardia spinosispora</i>    | WP_028936455.1 | NZ_KE386833:<br>complement(1066908..1068137) | WP_028936454.1 | NZ_KE386833:<br>complement(1066066..1066911) |
| Bacteria | <i>Pseudorhodoferax</i> sp. Leaf265   | WP_056659105.1 | NZ_LMMT01000004:<br>126988..129192           | WP_056659109.1 | NZ_LMMT01000004:<br>129170..130000           |
| Bacteria | <i>Pseudorhodoferax</i> sp. Leaf267   | WP_056179459.1 | NZ_LMMV01000004:<br>74307..76499             | WP_056179463.1 | NZ_LMMV01000004:<br>76483..77313             |
| Bacteria | <i>Pseudorhodoferax</i> sp. Leaf274   | WP_056897491.1 | NZ_LMNA01000001:                             | WP_056897492.1 | NZ_LMNA01000001:                             |



|          |                                               |                |                                                |                |                                                |
|----------|-----------------------------------------------|----------------|------------------------------------------------|----------------|------------------------------------------------|
|          |                                               |                | 455091..457304                                 |                | 457282..458112                                 |
| Bacteria | <i>Rhizobacter</i> sp. Root404                | WP_056470898.1 | NZ_LMDS01000005:<br>complement(264437..266662) | WP_056468103.1 | NZ_LMDS01000005:<br>complement(263594..264424) |
| Bacteria | <i>Rhizobium gallicum</i>                     | WP_040114823.1 | NZ_CP006880: 467178..468374                    | WP_040114824.1 | NZ_CP006880: 468387..469229                    |
| Bacteria | <i>Rhizobium mongolense</i>                   | WP_022713863.1 | NZ_ATTQ01000003:<br>240416..241612             | WP_022713864.1 | NZ_ATTQ01000003:<br>241625..242467             |
| Bacteria | <i>Rhizobium</i> sp. Root1203                 | WP_057470780.1 | NZ_LMCW01000029:<br>complement(23240..24436)   | WP_057470779.1 | NZ_LMCW01000029:<br>complement(22386..23228)   |
| Bacteria | <i>Rhizobium</i> sp. Root1220                 | WP_056543371.1 | NZ_LMDG01000032:<br>395785..396978             | WP_056543374.1 | NZ_LMDG01000032:<br>396993..397835             |
| Bacteria | <i>Rhizobium sullae</i>                       | WP_027510035.1 | NZ_ATZB01000009: 25500..26696                  | WP_027510036.1 | NZ_ATZB01000009:<br>WP_027510036               |
| Bacteria | <i>Rhizobium vignae</i>                       | WP_037087774.1 | NZ_JNNU01000031:<br>complement(13578..14774)   | WP_037087771.1 | NZ_JNNU01000031:<br>complement(12635..13468)   |
| Bacteria | <i>Rhodococcus fascians</i>                   | WP_037144716.1 | NZ_JMEW01000021:<br>1017593..1018807           | WP_037144077.1 | NZ_JMEW01000021:<br>1018804..1019625           |
| Bacteria | <i>Rhodopirellula baltica</i> SH 1            | WP_011122999.1 | /                                              | WP_011122998.1 | /                                              |
| Bacteria | <i>Rhodospirillales</i> bacterium<br>URHD0088 | WP_051473925.1 | NZ_JADL01000001:<br>complement(530701..533037) | WP_027297941.1 | NZ_JADL01000001:<br>complement(529818..530678) |
| Bacteria | <i>Rhodospirillum rubrum</i>                  | WP_011390591.1 | NC_017584:<br>complement(3214359..3215579)     | WP_011390590.1 | NC_017584:<br>complement(3213516..3214346)     |
| Bacteria | <i>Rhodovulum sulfidophilum</i>               | WP_042461266.1 | NZ_CP015418:<br>complement(2241184..2242380)   | WP_042461264.1 | NZ_CP015418:<br>complement(2240351..2241184)   |
| Bacteria | <i>Roseiflexus castenholzii</i>               | WP_012120903.1 | NC_009767:<br>complement(3089277..3090512)     | WP_012120902.1 | NC_009767:<br>complement(3088442..3089275)     |

|          |                                          |                |                                                |                |                                                |
|----------|------------------------------------------|----------------|------------------------------------------------|----------------|------------------------------------------------|
| Bacteria | <i>Roseiflexus</i> sp. RS-1              | WP_011957489.1 | NC_009523:<br>complement(3457268..3458494)     | WP_011957488.1 | NC_009523:<br>complement(3456432..3457265)     |
| Bacteria | <i>Ruania albidiflava</i>                | WP_022917014.1 | NZ_ATWL01000003:<br>75574..76797               | WP_022917015.1 | NZ_ATWL01000003:<br>76849..77679               |
| Bacteria | <i>Rubrobacter radiotolerans</i>         | WP_041338934.1 | NZ_CP007515: 154825..156063                    | WP_041338729.1 | NZ_CP007515: 156060..156884                    |
| Bacteria | <i>Saccharomonospora cyanea</i>          | WP_005456808.1 | NZ_CM001440:<br>complement(2792542..2793750)   | WP_005456807.1 | NZ_CM001440:<br>complement(2791691..2792524)   |
| Bacteria | <i>Saccharomonospora paurometabolica</i> | WP_028662672.1 | NZ_KI912259:<br>complement(153816..154796)     | WP_007023467.1 | NZ_KI912259:<br>complement(152972..153814)     |
| Bacteria | <i>Saccharomonospora saliphila</i>       | WP_048876745.1 | NZ_KB912678: 77520..78525                      | WP_019816331.1 | NZ_KB912678: 78527..79369                      |
| Bacteria | <i>Saccharopolyspora erythraea</i>       | WP_009948215.1 | NZ_AVCN01000257:<br>complement(3883..5118)     | WP_009948217.1 | NZ_AVCN01000257:<br>complement(3044..3877)     |
| Bacteria | <i>Saccharopolyspora rectivirgula</i>    | WP_029719428.1 | NZ_JNVU01000025:<br>215856..217040             | WP_029719427.1 | NZ_JNVU01000025:<br>217058..217882             |
| Bacteria | <i>Saccharopolyspora spinosa</i>         | WP_010306917.1 | NZ_GL877878: 691404..692618                    | WP_010306920.1 | NZ_GL877878: 692615..693445                    |
| Bacteria | <i>Salinibacterium</i> sp. PAMC 21357    | WP_010206263.1 | NZ_AHWA01000006:<br>complement(439348..440595) | WP_010206262.1 | NZ_AHWA01000006:<br>complement(438522..439355) |
| Bacteria | <i>Salinisphaera hydrothermalis</i>      | WP_037339199.1 | NZ_APNK01000023:<br>complement(27670..28878)   | WP_037339196.1 | NZ_APNK01000023:<br>WP_037339196               |
| Bacteria | <i>Salisaeta longa</i>                   | WP_022835817.1 | NZ_ATTH01000001:<br>1966588..1967799           | WP_022835818.1 | NZ_ATTH01000001:<br>1967925..1968755           |
| Bacteria | <i>Salsuginibacillus kocurii</i>         | WP_051081212.1 | NZ_KB898633: 36131..37378                      | WP_018924551.1 | NZ_KB898633: 37422..38249                      |
| Bacteria | <i>Sciscionella</i> sp. SE31             | WP_031465618.1 | NZ_JALM01000015: 36834..38042                  | WP_031465619.1 | NZ_JALM01000015: 38045..38887                  |
| Bacteria | <i>Serratia liquefaciens</i>             | WP_044548805.1 | NZ_DF820427:                                   | WP_044548803.1 | NZ_DF820427:                                   |

|          |                                                  |                |                                                |                |                                                |
|----------|--------------------------------------------------|----------------|------------------------------------------------|----------------|------------------------------------------------|
|          |                                                  |                | complement(357953..359170)                     |                | complement(357108..357941)                     |
| Bacteria | <i>Shigella sonnei</i>                           | WP_049241669.1 | NZ_JVCS01000047:<br>complement(29862..31079)   | WP_049241667.1 | NZ_JVCS01000047:<br>complement(29016..29849)   |
| Bacteria | <i>Shimazuella kribbensis</i>                    | WP_028776227.1 | NZ_ATZF01000002:<br>complement(447092..448306) | WP_028776226.1 | NZ_ATZF01000002:<br>complement(446241..447083) |
| Bacteria | <i>Sinorhizobium arboris</i>                     | WP_027998635.1 | NZ_ATYB01000009:<br>complement(64973..66169)   | WP_027998634.1 | NZ_ATYB01000009:<br>complement(64119..64961)   |
| Bacteria | <i>Sinorhizobium meliloti</i> 1021               | WP_010967705.1 | NZ_ATYP01000023: 36786..37982                  | WP_435974.1    | NZ_ATYP01000023: 37994..38836                  |
| Bacteria | <i>Sodalis praecaptivus</i>                      | WP_025422359.1 | NZ_CP006569: 2509367..2510605                  | WP_025422360.1 | NZ_CP006569: 2510595..2511425                  |
| Bacteria | <i>Solirubrobacterales</i> bacterium<br>URHD0059 | WP_028074450.1 | NZ_JIAT01000010:<br>complement(21430..22635)   | WP_028074449.1 | NZ_JIAT01000010:<br>complement(20609..21433)   |
| Bacteria | <i>Sporosarcina</i> sp. D27                      | WP_025785394.1 | NZ_AZUC01000052: 1782..2993                    | WP_025785395.1 | NZ_AZUC01000052: 3017..3847                    |
| Bacteria | <i>Sporosarcina</i> sp. ZBG7A                    | WP_039043749.1 | NZ_JWIB01000034:<br>complement(50288..51499)   | WP_039043748.1 | NZ_JWIB01000034:<br>complement(49434..50264)   |
| Bacteria | <i>Streptomonospora alba</i>                     | WP_040275127.1 | NZ_JROO01000033: 29779..30999                  | WP_040275128.1 | NZ_JROO01000033: 30996..31826                  |
| Bacteria | <i>Streptomyces atriruber</i>                    | WP_055563890.1 | NZ_LIPN01000038:<br>complement(7375..8628)     | WP_055563863.1 | NZ_LIPN01000038:<br>complement(6531..7352)     |
| Bacteria | <i>Streptomyces catenulae</i>                    | WP_030278744.1 | NZ_JODY01000001:<br>complement(274200..275438) | WP_030278741.1 | NZ_JODY01000001:<br>complement(273373..274194) |
| Bacteria | <i>Streptomyces cattleya</i>                     | WP_014151446.1 | NC_017585:<br>complement(735962..737608)       | WP_014151449.1 | NC_017585:<br>complement(733070..734050)       |
| Bacteria | <i>Streptomyces celluloflavus</i>                | WP_052856753.1 | NZ_JOEL01000013:<br>complement(254091..255344) | WP_052856752.1 | NZ_JOEL01000013:<br>complement(253197..254021) |
| Bacteria | <i>Streptomyces cellulosa</i>                    | WP_030661681.1 | NZ_JOEV01000002:                               | WP_030661664.1 | NZ_JOEV01000002:                               |

|          |                                     |                |                                                |                |                                                |
|----------|-------------------------------------|----------------|------------------------------------------------|----------------|------------------------------------------------|
|          |                                     |                | 128955..130217                                 |                | complement(122092..122922)                     |
| Bacteria | <i>Streptomyces exfoliatus</i>      | WP_024761330.1 | NZ_AZSS01000343:<br>complement(3647..4897)     | WP_024761329.1 | NZ_AZSS01000343:<br>complement(2662..3504)     |
| Bacteria | <i>Streptomyces kanamyceticus</i>   | WP_055546257.1 | NZ_LIQU01000105: 1..964                        | WP_055546259.1 | NZ_LIQU01000105: 992..1813                     |
| Bacteria | <i>Streptomyces scabrissporus</i>   | WP_020551151.1 | NZ_KB889662:<br>complement(23898..25142)       | WP_026218345.1 | NZ_KB889662:<br>complement(23072..23896)       |
| Bacteria | <i>Streptomyces showdoensis</i>     | WP_046907641.1 | /                                              | WP_046907640.1 | /                                              |
| Bacteria | <i>Streptomyces</i> sp. CNB091      | WP_018958124.1 | NZ_KB898997:<br>complement(49921..51174)       | WP_018958123.1 | NZ_KB898997:<br>complement(48996..49820)       |
| Bacteria | <i>Streptomyces</i> sp. NRRL F-3213 | WP_037806101.1 | NZ_JOIQ01000001:<br>390378..391622             | WP_037806102.1 | NZ_JOIQ01000001:<br>391609..392430             |
| Bacteria | <i>Streptomyces</i> sp. NRRL F-5650 | WP_031034311.1 | NZ_JOGV01000001:<br>complement(490909..492132) | WP_031034307.1 | NZ_JOGV01000001:<br>complement(490000..490830) |
| Bacteria | <i>Streptomyces</i> sp. Root431     | WP_056642402.1 | NZ_LMEI01000006:<br>248852..250102             | WP_056642405.1 | NZ_LMEI01000006:<br>250231..251073             |
| Bacteria | <i>Streptomyces</i> sp. TAA204      | WP_028430312.1 | NZ_AUKW01000002:<br>598636..599868             | WP_028430313.1 | NZ_AUKW01000002:<br>599988..600815             |
| Bacteria | <i>Streptomyces</i> sp. TAA486      | WP_028437930.1 | NZ_AUEV01000021:<br>complement(86434..87663)   | WP_028437929.1 | NZ_AUEV01000021:<br>complement(85617..86444)   |
| Bacteria | <i>Streptomyces</i> sp. WMMB 322    | WP_055488033.1 | NZ_LIPX01000017:<br>complement(73463..74692)   | WP_055488032.1 | NZ_LIPX01000017:<br>complement(72643..73473)   |
| Bacteria | <i>Streptomyces</i> sp. WMMB 714    | WP_045863171.1 | NZ_LAND01000003:<br>complement(82366..83604)   | WP_045863170.1 | NZ_LAND01000003:<br>complement(81461..82288)   |
| Bacteria | <i>Streptomyces varsoviensis</i>    | WP_030886468.1 | NZ_JOBFO1000036: 48502..49770                  | WP_030886472.1 | NZ_JOBFO1000036: 50014..50835                  |

|          |                                                |                |                                                |                |                                                |
|----------|------------------------------------------------|----------------|------------------------------------------------|----------------|------------------------------------------------|
| Bacteria | <i>Streptomyces venezuelae</i>                 | WP_055646478.1 | NZ_CP013129:<br>complement(1273690..1274940)   | WP_055644836.1 | NZ_CP013129:<br>complement(1272756..1273598)   |
| Bacteria | <i>Streptomyces vietnamensis</i>               | WP_041127985.1 | NZ_CP010407:<br>complement(1206059..1207333)   | WP_041133610.1 | NZ_CP010407:<br>complement(1205229..1206053)   |
| Bacteria | <i>Succinispira mobilis</i>                    | WP_019879051.1 | NZ_KB913028: 687421..688638                    | WP_019879052.1 | NZ_KB913028: 688656..689477                    |
| Bacteria | <i>Terrisporobacter othiniensis</i>            | WP_039679843.1 | NZ_JWHR01000093:<br>52091..53299               | WP_039679844.1 | NZ_JWHR01000093: 53323..54156                  |
| Bacteria | <i>Tetrasphaera</i> sp. Soil756                | WP_055814716.1 | NZ_LMSE01000004:<br>complement(27340..28551)   | WP_055814711.1 | NZ_LMSE01000004:<br>complement(26480..27343)   |
| Bacteria | <i>Thermacetogenium phaeum</i>                 | WP_015049610.1 | NC_018870:<br>complement(463426..464769)       | WP_015049612.1 | NC_018870:<br>complement(465615..466457)       |
| Bacteria | <i>Thermanaerotherix daxensis</i>              | WP_054520480.1 | NZ_LGKO01000002:<br>complement(475055..476278) | WP_054520479.1 | NZ_LGKO01000002:<br>complement(474198..475028) |
| Bacteria | <i>Thermoactinomyces daqus</i>                 | WP_033101852.1 | NZ_JPST01000036:<br>complement(21324..21617)   | WP_033101851.1 | NZ_JPST01000036:<br>complement(20485..21309)   |
| Bacteria | <i>Thermoactinomyces vulgaris</i>              | WP_054095744.1 | NZ_LGKI01000145:<br>complement(40887..42104)   | WP_054095743.1 | NZ_LGKI01000145:<br>complement(40041..40874)   |
| Bacteria | <i>Thermoactinomycetaceae</i> bacterium<br>GD1 | WP_044640401.1 | NZ_LN812102:<br>complement(770346..771608)     | WP_044640400.1 | NZ_LN812102:<br>complement(769529..770368)     |
| Bacteria | <i>Thermoanaerobacter ethanolicus</i>          | WP_003869364.1 | NZ_AEYS01000004:<br>complement(4642..5862)     | WP_003869363.1 | NZ_AEYS01000004:<br>complement(3791..4624)     |
| Bacteria | <i>Thermomicrobium roseum</i>                  | WP_012642670.1 | NC_011961:<br>complement(67225..68463)         | WP_041437438.1 | NC_011961:<br>complement(66360..67190)         |
| Bacteria | <i>Thermorudis peleae</i>                      | WP_038037531.1 | NZ_JQMP01000001:<br>320900..322138             | WP_038037908.1 | NZ_JQMP01000001:<br>322185..323018             |

|          |                                                           |                |                                                |                |                                                |
|----------|-----------------------------------------------------------|----------------|------------------------------------------------|----------------|------------------------------------------------|
| Bacteria | <i>Thermovirga lienii</i>                                 | WP_014163818.1 | NC_016148:<br>complement(1754704..1755900)     | WP_014163817.1 | NC_016148:<br>complement(1753858..1754685)     |
| Bacteria | <i>Timonella senegalensis</i>                             | WP_019147304.1 | NZ_HE978641:<br>complement(765127..766347)     | WP_019147303.1 | NZ_HE978641:<br>complement(764235..765056)     |
| Bacteria | <i>Tistrella mobilis</i>                                  | WP_014744977.1 | NC_017956: 1629444..1630667                    | WP_014744978.1 | NC_017956: 1630670..1631500                    |
| Bacteria | <i>Variovorax</i> sp. URHB0020                            | WP_051565477.1 | NZ_JHVQ01000005:<br>279983..282229             | WP_028249325.1 | NZ_JHVQ01000005:<br>282260..283090             |
| Bacteria | <i>Virgibacillus pantothenicus</i>                        | WP_050352496.1 | NZ_LGTO01000007:<br>1656547..1657773           | WP_050352497.1 | NZ_LGTO01000007:<br>1657775..1658599           |
| Bacteria | <i>Viridibacillus arenosi</i>                             | WP_038179451.1 | NZ_ASQA01000006:<br>complement(79354..80562)   | WP_038179449.1 | NZ_ASQA01000006:<br>complement(78508..79338)   |
| Bacteria | <i>Viridibacillus arvi</i>                                | WP_053418954.1 | NZ_LILB01000008:<br>complement(472018..473226) | WP_053418953.1 | NZ_LILB01000008:<br>complement(471172..472002) |
| Bacteria | <i>Wenxinia marina</i>                                    | WP_018302558.1 | NZ_KN848374:<br>complement(592747..593970)     | WP_018302559.1 | NZ_KN848374:<br>complement(591930..592760)     |
| Bacteria | <i>Yersinia enterocolitica</i> subsp. enterocolitica 8081 | WP_005176149.1 | NZ_CGBA01000009:<br>complement(78516..79748)   | WP_011815345.1 | NZ_CTIY01000015:<br>complement(45868..46698)   |
| Bacteria | <i>Yersinia pekkanenii</i>                                | WP_049610150.1 | NZ_CWJL01000010:<br>complement(77717..78979)   | WP_049610148.1 | NZ_CWJL01000010:<br>complement(76777..77607)   |
| Bacteria | <i>Yersinia pestis</i> CO92                               | WP_002211477.1 | NZ_CP009973: 3174814..3176031                  | WP_002228178.1 | /                                              |
| Bacteria | <i>Zavarzinella formosa</i>                               | WP_020468962.1 | NZ_JH636439: 1339596..1340801                  | WP_020468960.1 | NZ_JH636439:<br>complement(1338391..1339221)   |
| Fungi    | <i>Anthracoystis flocculosa</i> PF-1                      | XP_007881871.1 | NW_006920892:<br>complement(92421..93940)      | XP_007881872.1 | NW_006920892: 94217..95279                     |
| Fungi    | <i>Arthrotrrys oligospora</i> ATCC                        | XP_011126097.1 | NW_011645730:                                  | XP_011125999.1 | NW_011645727:                                  |

|       |                                              |                |                                               |                |                                             |
|-------|----------------------------------------------|----------------|-----------------------------------------------|----------------|---------------------------------------------|
|       | 24927                                        |                | complement(177821..179095)                    |                | complement(215843..216831)                  |
| Fungi | <i>Aspergillus clavatus</i> NRRL 1           | XP_001269250.1 | NW_001517094:<br>complement(2187963..2189297) | XP_001269251.1 | NW_001517094:<br>2189606..2190693           |
| Fungi | <i>Aspergillus flavus</i> NRRL3357           | XP_002380522.1 | NW_002477244:<br>1465953..1467236             | XP_002380525.1 | NW_002477244: 1471932..1472991              |
| Fungi | <i>Aspergillus fumigatus</i> Af293           | XP_752378.1    | NC_007194: 2608548..2609843                   | XP_752377.1    | NC_007194:<br>complement(2607310..2608266)  |
| Fungi | <i>Aspergillus nidulans</i> FGSC A4          | XP_682200.1    | NT_107002:<br>complement(214057..215385)      | XP_682201.1    | NT_107002: 215546..216544                   |
| Fungi | <i>Aspergillus niger</i> CBS 513.88          | XP_001392313.2 | NT_166524:<br>complement(429893..431182)      | XP_001392314.1 | NT_166524: 431829..432884                   |
| Fungi | <i>Aspergillus nomius</i> NRRL 13137         | XP_015402016.1 | NW_015378550:<br>complement(21405..22667)     | XP_015403291.1 | NW_015378407: 1376..2414                    |
| Fungi | <i>Aspergillus oryzae</i> RIB40              | XP_001825344.1 | NW_001884677:<br>1114606..1116069             | XP_001825346.1 | NW_001884677: 1121695..1122934              |
| Fungi | <i>Aureobasidium namibiae</i> CBS<br>147.97  | XP_013429585.1 | NW_013581205:<br>complement(175483..176745)   | XP_013429450.1 | NW_013581205: 176984..177826                |
| Fungi | <i>Aureobasidium subglaciale</i><br>EXF-2481 | XP_013348567.1 | NW_013566995:<br>complement(109045..110307)   | XP_013348569.1 | NW_013566995: 110547..111389                |
| Fungi | <i>Baudoinia panamericana</i> UAMH<br>10762  | XP_007671722.1 | NW_006911257: 415095..416378                  | XP_007671721.1 | NW_006911257:<br>complement(413864..414957) |
| Fungi | <i>Bipolaris maydis</i> ATCC 48331           | XP_014078654.1 | NW_014024926:<br>complement(568701..569957)   | XP_014078655.1 | NW_014024926: 570126..571175                |
| Fungi | <i>Bipolaris oryzae</i> ATCC 44560           | XP_007691418.1 | NW_006911432: 41121..42377                    | XP_007691417.1 | NW_006911432:<br>complement(39955..40878)   |

|       |                                                |                |                                               |                |                                               |
|-------|------------------------------------------------|----------------|-----------------------------------------------|----------------|-----------------------------------------------|
| Fungi | <i>Bipolaris sorokiniana</i> ND90Pr            | XP_007700716.1 | NW_006911902: 821525..823194                  | XP_007700715.1 | NW_006911902:<br>complement(820388..821417)   |
| Fungi | <i>Bipolaris victoriae</i> FI3                 | XP_014561279.1 | NW_014575386: 300830..302086                  | XP_014561377.1 | NW_014575386:<br>complement(299665..300586)   |
| Fungi | <i>Bipolaris zeicola</i> 26-R-13               | XP_007707408.1 | NW_006912055:<br>300859..302115               | XP_007707287.1 | NW_006912055:<br>complement(299694..300615)   |
| Fungi | <i>Blastomyces gilchristii</i> SLH14081        | XP_002623800.1 | NW_003101671:<br>complement(1794848..1796128) | XP_002623801.1 | NW_003101671: 1796667..1798038                |
| Fungi | <i>Botrytis cinerea</i> B05.10                 | XP_001555090.1 | NW_001814540: 328413..329684                  | XP_001555089.1 | NW_001814540:<br>complement(326808..327786)   |
| Fungi | <i>Capronia coronata</i> CBS 617.96            | XP_007724410.1 | NW_006912896:<br>2173887..2175266             | XP_007724409.1 | NW_006912896:<br>complement(2172634..2173473) |
| Fungi | <i>Capronia epimyces</i> CBS 606.96            | XP_007737709.1 | NW_006912912:<br>complement(1223355..1224737) | XP_007737710.1 | NW_006912912: 1225332..1226171                |
| Fungi | <i>Cladophialophora carrionii</i> CBS 160.54   | XP_008725595.1 | NW_008481827:<br>complement(2661190..2662572) | XP_008725596.1 | NW_008481827:<br>2663022..2663858             |
| Fungi | <i>Cladophialophora psammophila</i> CBS 110553 | XP_007741136.1 | NW_006912924: 416348..417730                  | XP_007741135.1 | NW_006912924:<br>complement(415021..415860)   |
| Fungi | <i>Cladophialophora yegresii</i> CBS 114405    | XP_007759270.1 | NW_006913049: 966379..967767                  | XP_007759269.1 | NW_006913049:<br>complement(965110..965946)   |
| Fungi | <i>Coniophora puteana</i> RWD-64-598 SS2       | XP_007764508.1 | NW_006913054:<br>complement(757411..758807)   | XP_007764509.1 | NW_006913054: 759171..760213                  |
| Fungi | <i>Coniosporium apollinis</i> CBS 100218       | XP_007783822.1 | NW_006913307:<br>complement(9995..11014)      | XP_007783823.1 | NW_006913307: 11457..12504                    |
| Fungi | <i>Cyphellophora europaea</i> CBS 101466       | XP_008720383.1 | NW_008481814:<br>complement(120735..122165)   | XP_008720387.1 | NW_008481814:<br>complement(128362..129198)   |



|       |                                          |                |                                               |                |                                               |
|-------|------------------------------------------|----------------|-----------------------------------------------|----------------|-----------------------------------------------|
| Fungi | <i>Eutypa lata</i> UCREL1                | XP_007798609.1 | NW_006915772: 73881..75408                    | XP_007798608.1 | NW_006915772:<br>complement(72482..73522)     |
| Fungi | <i>Exophiala aquamarina</i> CBS 119918   | XP_013262741.1 | NW_013550585:<br>complement(4010862..4012256) | XP_013262143.1 | NW_013550585: 2224691..2225594                |
| Fungi | <i>Exophiala dermatitidis</i> NIH/UT8656 | XP_009160141.1 | NW_008751651:<br>2347189..2348568             | XP_009160140.1 | NW_008751651:<br>complement(2345882..2346721) |
| Fungi | <i>Exophiala xenobiotica</i>             | XP_013316699.1 | NW_013562492:<br>complement(1620945..1622487) | XP_013316700.1 | NW_013562492: 1622706..1623548                |
| Fungi | <i>Fibroporia radiculosa</i>             | XP_012181385.1 | NW_012133360:<br>complement(6877..8166)       | XP_012181386.1 | NW_012133360: 8411..9365                      |
| Fungi | <i>Fonsecaea pedrosoi</i> CBS 271.37     | XP_013287225.1 | NW_013550614:<br>1963291..1964673             | XP_013287224.1 | NW_013550614:<br>complement(1961970..1962809) |
| Fungi | <i>Histoplasma capsulatum</i> NAM1       | XP_001541274.1 | NW_001813980: 773150..776440                  | XP_001541273.1 | NW_001813980:<br>complement(771328..772300)   |
| Fungi | <i>Leptosphaeria maculans</i> JN3        | XP_003839322.1 | NW_003533866:<br>complement(2008817..2010076) | XP_003839323.1 | NW_003533866:<br>2010301..2011195             |
| Fungi | <i>Moesziomyces antarcticus</i>          | XP_014656632.1 | NW_014639002:<br>complement(662279..663667)   | XP_014656633.1 | NW_014639002: 663956..665139                  |
| Fungi | <i>Neofusicoccum parvum</i> UCRNP2       | XP_007583355.1 | NW_006887908: 76852..78454                    | XP_007583354.1 | NW_006887908:<br>complement(75129..76269)     |
| Fungi | <i>Neosartorya fischeri</i> NRRL 181     | XP_001264757.1 | NW_001509770:<br>complement(2364537..2365829) | XP_001264758.1 | NW_001509770: 2366101..2367045                |
| Fungi | <i>Neurospora crassa</i> OR74A           | XP_964779.1    | NC_026501: 6922584..6925468                   | XP_964780.1    | NC_026501:<br>complement(6921148..6922640)    |
| Fungi | <i>Neurospora tetrasperma</i> FGSC 2508  | XP_009855735.1 | NW_009799179:<br>complement(3038354..3039676) | XP_009855736.1 | NW_009799179: 3040133..3041143                |

|       |                                                 |                |                                                |                |                                               |
|-------|-------------------------------------------------|----------------|------------------------------------------------|----------------|-----------------------------------------------|
| Fungi | <i>Parastagonospora nodorum</i> SN15            | XP_001799813.1 | NW_001884563: 180022..181453                   | XP_001799812.1 | NW_001884563:<br>complement(178966..179862)   |
| Fungi | <i>Penicillium digitatum</i> Pd1                | XP_014532690.1 | NW_014574583:<br>complement(5565624..5566922)  | XP_014532692.1 | NW_014574583: 5569856..5570765                |
| Fungi | <i>Penicillium rubens</i> Wisconsin<br>54-1255  | XP_002560856.1 | NW_003020077:<br>complement(1203709..1204989)  | XP_002558911.1 | NW_003020074: 1141701..1142616                |
| Fungi | <i>Pestalotiopsis fici</i> W106-1               | XP_007826810.1 | NW_006917091: 124394..125761                   | XP_007826809.1 | NW_006917091:<br>complement(122808..123897)   |
| Fungi | <i>Phaeoacremonium minimum</i><br>UCRPA7        | XP_007917479.1 | NW_006921397:<br>complement(93161..94186)      | XP_007917487.1 | NW_006921397: 94882..95794                    |
| Fungi | <i>Podospora anserina</i> S mat+                | XP_001907064.1 | NW_001914853:<br>complement(661552..662799)    | XP_001907065.1 | NW_001914853: 663171..664090                  |
| Fungi | <i>Pseudocercospora fijiensis</i><br>CIRAD86    | XP_007920164.1 | NW_006921532:<br>complement(8583228..8584611)  | XP_007919718.1 | NW_006921532: 8584871..8585965                |
| Fungi | <i>Pseudozyma hubeiensis</i> SY62               | XP_012186753.1 | NW_012133791:<br>complement(296574..297962)    | XP_012186754.1 | NW_012133791: 298220..299179                  |
| Fungi | <i>Rasamsonia emersonii</i> CBS 393.64          | XP_013323502.1 | NW_013562625: 80206..81501                     | XP_013323499.1 | NW_013562625:<br>complement(74182..75168)     |
| Fungi | <i>Rhinocladiella mackenziei</i> CBS<br>650.93  | XP_013268730.1 | NW_013550598:<br>1407726..1409105              | XP_013268729.1 | NW_013550598:<br>complement(1406499..1407341) |
| Fungi | <i>Sclerotinia sclerotiorum</i> 1980<br>UF-70   | XP_001598468.1 | NW_001820835:<br>complement(1456344..1457609)  | XP_001598469.1 | NW_001820835: 1458476..1459690                |
| Fungi | <i>Serpula lacrymans</i> var. lacrymans<br>S7.9 | XP_007322105.1 | NW_006763301:<br>complement(734299..735683)    | XP_007322106.1 | NW_006763301: 735792..736831                  |
| Fungi | <i>Setosphaeria turcica</i> Et28A               | XP_008029099.1 | NW_007360266::<br>complement(1366274..1367539) | XP_008029100.1 | NW_007360266: 1367727..1368671                |

|       |                                            |                |                                               |                |                                               |
|-------|--------------------------------------------|----------------|-----------------------------------------------|----------------|-----------------------------------------------|
| Fungi | <i>Sordaria macrospora</i> k-hell          | XP_003352718.1 | NW_003546238:<br>1329903..1331204             | XP_003352717.1 | NW_003546238:<br>complement(1328432..1329344) |
| Fungi | <i>Talaromyces marneffei</i> ATCC<br>18224 | XP_002151587.1 | NW_002196666:<br>complement(1467301..1468705) | XP_002151588.1 | NW_002196666: 1468801..1470000                |
| Fungi | <i>Talaromyces stipitatus</i> ATCC 10500   | XP_002341451.1 | NW_002990113:<br>4070959..4072460             | XP_002341450.1 | NW_002990113:<br>complement(4069374..4070629) |
| Fungi | <i>Trichoderma atroviride</i> IMI 206040   | XP_013942940.1 | NW_014013632: 110291..111774                  | XP_013942939.1 | NW_014013632:<br>complement(108958..109861)   |
| Fungi | <i>Trichoderma reesei</i> QM6a             | XP_006969368.1 | NW_006711178:<br>complement(70077..71345)     | XP_006969387.1 | NW_006711178: 71775..72771                    |
| Fungi | <i>Trichoderma virens</i> Gv29-8           | XP_013961053.1 | NW_014013748: 342550..343971                  | XP_013961052.1 | NW_014013748:<br>complement(341198..342101)   |
| Fungi | <i>Ustilago maydis</i> 521                 | XP_011388427.1 | NC_026482: 37552..38943                       | XP_011388426.1 | NC_026482:<br>complement(36336..37313)        |
| Fungi | <i>Zymoseptoria tritici</i> IPO323         | XP_003856186.1 | NC_018218: 2279893..2281296                   | XP_003857466.1 | NC_018218:<br>complement(2278392..2279562)    |

---
